# Supplementary material for: Variations in the Intragene Methylation Profiles Hallmark Induced Pluripotency
Source: Biomed Res Int. 2015 Nov 5;2015:976362. doi: 10.1155/2015/976362 (PMC4651640; doi:10.1155/2015/976362)
Supplement: Supplementary file 1 — Table S1. List of genes used to test the enrichment: PCGT and MESC genes, PCGT repressed methylated gene groups H3H4, H3K27 and their union (bivalent group), and 100 mostly unstable genes for discrimination of 13 types of cancer [13]. [file 976362.f1.xlsx]

## Sheet: Sheet1
PCGT gene set	MESC gene set	H3K4 gene set	H3K27 gene set	Bivalent gene set	Cancer 'top 100' gene set
ABAT	A1BG	MKNK1	EPB41L1	RYR3	ASIC2
ABCA1	NAT2	SH3BP2	TTC39A	TRPM2	TMEM132C
ABO	AKT3	ARHGEF10	PLEKHG5	NRCAM	DPP6
ABR	NR2E3	ZNF646	RBPJL	MCF2L	PRKCB
ACADL	GNPDA1	PLXNB2	RHD	FAM65B	LINC00461
ASIC2	CDH3	KIAA0317	EBF4	NRG2	TNR
ASIC1	TANK	DIDO1	TP53AIP1	BAI2	CNTNAP5
ACHE	PDCD6IP	SNPH	PER3	HS6ST1	NRXN1
ACTC1	BCL2L10	ANKRD28	PRDM16	PTPRT	CACNA1A
ACTN2	BCL2L11	CYP4F3	ARHGAP9	ASTN1	OPCML
ACVR1B	CDH4	HSPH1	PPP1R14A	DPYSL4	EPHA10
ACVRL1	GNE	TLK1	CREB3L3	HSPA12A	CADM3
ADARB2	INSL5	ESR2	ZFAT	SH3PXD2A	NTM
ADCY1	SH2D3C	HDAC4	ELN	PDE4DIP	MAGI2
ADCY5	MAMLD1	TP53TG1	CRHR2	PLXNA2	RBFOX1
ADCY8	CST8	ASAP2	PNMA3	RAP1GAP	NRXN2
ADCYAP1	ABCB6	NUPL1	LIN37	IQSEC2	PAX6
ADCYAP1R1	DNM1L	ARHGEF9	AJAP1	ECE2	VAX1
ADM	ABCC9	PPIP5K2	OTOF	TBC1D12	CACNA1E
ADORA2B	NR1H3	PREPL	RHBG	KALRN	FAM123C
ADRA1D	IL18BP	SLC25A44	KCND3	ULK2	PAX5
ADRA1B	RWDD2B	HS2ST1	PRKAG3	ASTN2	SHANK1
ADRA1A	HUWE1	OTUD3	C9orf31	TBC1D9B	LDLRAD2
ADRA2A	TSPAN32	RPRD2	SHANK1	DOCK10	ANK1
ADRB1	ATP9A	KLHL21	LOC220077	MAGI2	TNFRSF8
ADRB3	KCNK7	RABGAP1L	KLK4	MOP-1	CA10
ACAN	TSPAN3	DENND4B	BCAT2	FGF5	PAX3
JAG1	CDH12	GRB7	SPTBN4	MYO10	SHOX2
AGTR1	TSPAN1	RNGTT	CSPG4P1Y	ACSL6	KCNK9
AIM1	TRIM10	MAP3K7	KLK2	ABLIM3	SLC17A7
ALDH1A3	SGK2	PARK2	LOC402469	TBC1D9	CD8A
ALK	PREB	CEP68	CFB	CHST2	RPH3A
ALOX5	HIPK3	JMJD6	FP588	SEMA6C	GRIN2A
ALOX15	CDH13	KIAA0586	TSKS	SEZ6L	TMEM132D
ALPPL2	CDH15	KIF1B	TMC2	BAHD1	NRN1
ALX3	PDIA6	FAM21C	CD300LG	ANKRD6	ZIC4
AMPD3	CELA3A	MARCH6	ADAM33	RPH3A	SLC6A3
AMPH	ARFRP1	HDAC5	PSORS1C1	AMOTL2	GRID2IP
BIN1	CDH16	RGL2	RHCE	SCARF2	PAX7
ANK1	TOB1	ITPR2	SLC25A42	LIMCH1	ZNF536
AOX1	C4orf6	ATP8A1	CMTM5	ARHGEF4	EN1
APLP1	CLEC3A	HKR1	OBP2A	ARHGAP9	TBR1
FAS	EBI3	ATP9A	OBP2B	EPB41L4A	FLI1
AQP3	GPR64	BZRAP1	GLYCAM1	ECEL1	CACNG3
AQP5	CDH17	EXPH5	APLN	MYO5B	GCM2
ARF5	MBNL2	GIGYF2	FBRS	GALNTL1	PTPRR
ARHGAP6	AASS	ATG13	OBSL1	SEC14L2	SEZ6
PHOX2A	PDZK1IP1	PPP6R2	FER1L4	KIAA1217	CNGA3
ARNTL	CDH18	RRP12	MOGAT2	ATXN7L1	VIPR2
ASCL1	LPAR6	SS18L1	SPEF2	DKK2	OTX2
ASCL2	ODZ1	SIN3B	UNC80	PDE11A	LHX3
ASTN1	CDK3	PAN2	SAMD11	DSCR6	DAB1
ZFHX3	TSHZ1	XYLB	TTC9B	HECW2	RYR1
ATOH1	MPHOSPH9	AP1G1	LOC149373	PCDH10	DLG2
ATP1A1	DHRS2	MAPRE2	GATS	TMEM2	FOXG1
ATP1A3	CALCRL	MLLT4-AS1	PHC2	NAV2	NTSR1
ATP12A	SSX3	RGS11	HS6ST2	NFIA	SRRM4
ATP1B2	PRG4	PMS2L2	ADCY4	AKR1E2	EBF2
ATP7B	ANGPTL7	TOX4	LOC729866	PLCE1	PRDM14
AVPR1B	KLRG1	ESYT1	CD37	ZNF295	DLK1
BACH1	GDF11	KDM4C	ARMC12	CHST11	ANKS1B
BAI3	GPA33	DDX46	TINAGL1	PARD6G	EBF1
NKX3-2	CD96	RREB1	HMCN2	KCNH2	BRSK2
BCL2	RCAN2	CLCN3	COMP	NDRG4	CELF5
BCL3	MSLN	PKN3	MATN4	HIVEP3	SLC12A5
BDNF	TIMM17B	DNM3	DOK7	NIN	HS3ST4
BFSP1	SLC17A2	AHCYL2	KCP	SFMBT2	C1orf94
BHMT	CNKSR1	FBXO21	MOV10L1	C2CD2	GDF6
BIK	PRSS16	MAU2	LINC00269	FAM129A	RNF220
BLVRA	LILRB2	WDR47	LOC100130872	RIMBP3	CPEB1
BNC1	SPEG	CNKSR2	KANK4	PARD3B	OTP
BMI1	APC2	CDK12	LOC100131894	DCHS1	DPP10
BMP1	KATNB1	KIAA0907	FUCA1	NPAS3	GPR123
BMP2	NMUR1	ZNF44	BGN	SPOCK3	XKR4
BMP3	B3GALT5	ZNF12	C19orf45	RADIL	MAST1
BMP4	LAMC3	CA5B	PIWIL1	SLITRK2	ALX4
BMP6	IKZF1	UBE2K	EXOC3L2	KIRREL3	ALX3
BMP7	KBTBD10	SLC9A8	LOC100131864	ST6GAL2	MMEL1
BMPR1B	SIRPB1	CPEB3	ABLIM2	TMEM132D	FAM19A1
BNIP3	CDKN3	INPP5F	PDE4C	SCIN	TBX15
FOXL2	B3GNT3	NTNG1	ABHD14B	RNF157	IRF4
KLF9	CLEC4M	PALLD	KIAA1755	FAM65A	FAM135B
KLF5	TLR6	PCNX	C1orf200	HS6ST2	NR2E1
FMNL1	MRVI1	DZIP1	FAM166A	BCL2L11	OTX2OS1
C18orf1	PKDREJ	DIS3	IGSF11	ARHGEF26	GRM1
CA3	TRDN	FNBP4	LOC100131195	PARD3	HAS1
CA4	ABCA9	TP53TG3	C20orf112	SHROOM1	LMX1A
CA7	ABCA8	TP53TG3B	NFAM1	CDC20B	MMP9
CA8	KLF2	CDH1	ATP1A4	RGAG4	UNC13A
CA12	CACNG3	GOLGA3	SLC12A5	PGR	CSMD1
CACNA1A	CDR1	DBF4	HEPACAM	ASXL1	CHRM2
CACNA1C	BTN3A3	DFFB	LOC100131821	TERT	GRM5
CACNA1D	CORO2B	KAZN	LOC100130238	SLC16A2	FGF14
CACNB3	DLC1	MON2	CCDC108	PDE8B	PIK3R5
CACNB4	CPQ	TTC28	C1orf170	STX1A	LHX8
CALB2	CDSN	EPN2	NDRG4	NUDT14	NCAN
CALCA	NSA2	SMG5	TTLL10	PHLDB1	NELL1
CALCB	ARIH2	TNRC6B	COL13A1	CADM1	PRDM13
CALCR	CD52	PHF8	LOC100133145	NOXA1	LHFPL3
CAMK4	RBM14	TRO	LOC100128946	ANKRD18A	KIF19
CAMK2B	OLFM1	CCHCR1	NXF4	CANT1
CASP2	GPNMB	TUBD1	SH2D5	WLS
CASR	CLEC10A	EPB41L4B	ACSS1	AFF2
RUNX3	SLC25A17	BPTF	HAUS7	THPO
CBR3	CEACAM5	FZD4	HOXC12	APCDD1
CCK	VTI1B	PEX5L	VWA5B1	FERMT1
CCKBR	VAT1	MUTYH	LOC399829	ALS2CL
CD1D	SEMA6B	KLHL3	CHD5	MEX3D
CD8A	SEMA4D	COG6	C20orf141	SYT15
TNFSF8	FBXW10	TRMT6	LOC100129763	MGAT5B
CD34	CEBPE	ZC4H2	LOC100130468	ABCB9
CD38	ATG7	TPCN1	CRB2	KCNMA1
ENTPD3	UBD	ZNF512B	LOC100130502	CSMD3
CD44	BATF	RALGAPB	MDGA1	AQP4
CD47	CEBPG	NLN	SLC30A3	GPR126
CD70	PROCR	ODF2L	DNAH10OS	TTYH1
CD151	AGR2	DLG3	LOC100128651	SCP2
CDH3	CEL	KIDINS220	ARHGAP33	ZNF250
CDH4	OLFM4	TLE4	WNT9B	CAST
CDH6	AKAP3	FSTL5	LOC100129938	OSBPL6
CDH7	MRPL28	SLC39A10	LOC100129498	KCNC3
CDH8	GNLY	GKAP1	LOC100131346	RPS6KA3
CDH11	TACC2	SLC26A6	RGS9BP	RASAL1
CDH13	IFITM2	KIF20B	ARRDC2	DCLK2
CDKN1A	COLEC10	LITAF	LOC644962	CELF3
CDKN1C	TXNRD2	CDH9	C1orf86	EPHA7
CDKN2A	SLCO1B1	TNFRSF12A	LOC100127967	CAMK2D
CDKN2B	SH2B2	CACNA1A	LOC100130768	RGS6
CDKN2C	HEXIM1	KIF15	RNF207	MLLT6
CDX1	TRIM16	RRM2B	LOC100131907	SYN3
CDX2	POSTN	INPP5K	LOC100129999	SPOCK1
CEBPA	RGS14	RBM45	COL11A2	CELF4
CFTR	LEFTY1	ING1	CASZ1	NFKBIB
CHAD	SPHAR	PCNP	GPAT2	LTBP2
CHAT	SCGB1D2	GEMIN2	RUFY4	PHLDB2
CHN2	SCGB1D1	SORBS1	PRAMEL	PLD1
CHRM2	KHDRBS1	KLHDC5	GRM4	KCNK2
CHRNA3	KLF1	MYEF2	SOX6	REPS2
CHRNA7	CXCR6	TXNDC16	DLEC1	SLC4A4
CIDEA	CD226	CC2D2A	FLJ42875	PDE4D
CISH	GNA13	SEMA6A	YIF1B	GRIN1
CNTFR	TNFSF13B	FAM214A	DPCR1	ABCB1
COL1A1	AVIL	STAMBPL1	COL2A1	GUCY1B3
COL2A1	B3GNT2	SMEK2	MYO16	ZFP37
COL4A3	CETN1	RRBP1	NT5C1A	ARHGAP6
COL9A2	GNB5	SMPD4	IL28B	CLCN2
COL12A1	CLDN16	TMEM181	TNFRSF1B	ADARB2
COL13A1	UGT2B11	MLH3	LOC100129831	CISH
COL15A1	RFPL3	MST4	DMKN	RGS14
COL19A1	RAI2	MAGED4B	LYPD5	CACNA2D2
COMP	PTTG2	MAGED4	STRA6	GFRA1
COX6A2	MASP2	SLC7A11	KLK15	ARNTL
CPD	CAPN9	FNIP2	IKZF3	SH2D2A
CPE	GIPC1	POLR3E	KLK1	PFKFB3
CPT1A	PLAC1	BAZ2B	TCEA3	ESR2
CR2	ARPP21	ZSWIM5	ABHD14A	MBNL2
CRABP1	SLC17A3	POGK	FAM27A	NOL3
CREBL2	VAMP5	KANK2	LTB4R	DGKA
CRH	OR5I1	ABCB9	SLC10A3	NRXN1
CRHBP	CYSLTR1	KIAA1524	C10orf58	RGS9
CRHR1	SEPT9	DFNB31	POU2F2	REV3L
CRHR2	CCR9	BDAG1	LINC00051	PDE4A
CRIP1	CGA	GPR124	KDELR1	SURF4
CRMP1	CGB	PQBP1	PLCB2	ABCC3
CRYBA2	CEACAM3	RECQL5	ENTPD2	MTSS1
CRYM	PPP1R17	PARD6B	HES2	GADD45B
CSF1	SRCAP	LMO3	DBNDD2	NDRG2
CSK	CCL27	PFKFB2	APLP1	FLNC
NKX2-5	SLC22A7	RIMS1	CAMTA2	POMT1
CTNNA1	CEACAM7	TOPORS	ZBTB32	CXCL14
CTNND2	CD300C	TLE3	GPR157	ITGA11
CYP1B1	EDDM3A	PPP6R3	IGLV6-57	SMARCD1
CYP2J2	CEACAM8	EIF2C4	IQSEC3	SLC9A5
CYP24A1	ACTL7B	KIF16B	FAM110D	ETV7
CYP26A1	ACTL7A	GBA2	LRRC25	ZFPM2
CYP27A1	NPFFR2	KIAA1614	KIF19	PTCH2
CYP27B1	PROKR1	GPR107	SIRPA	DYNC1I1
DACH1	LYVE1	OBSCN	MLC1	PDE10A
DGKG	PPBPL2	MAST2	RASIP1	GALNTL4
DBP	ADCY3	SCYL1	TOMM5	SLIT2
DCC	TXNL4A	REV1	FITM2	ABO
DFNA5	UTS2	PEX6	FAM27E3	HRH3
COCH	EDAR	PTBP2	TMC4	GABRQ
DIO3	MORF4L1	ZNRF3	DACT3	MAN1B1
DLX1	POP1	CPEB4	KIAA1683	SLC34A2
DLX2	UGT2A1	PLEKHA5	ZDHHC19	TGFA
DLX3	PRSS21	KLHL4	KAZN	FAM203A
DLX4	ACOT2	PHF21A	ATP6V1B1	ADAM22
DLX5	C10orf116	CNTNAP3	TFAP2E	WDR91
DMRT1	LILRB5	XPO4	COL20A1	AR
DYNC1I1	SDS	KIAA1731	SLC11A1	CAV1
DPH1	SLC27A5	UBE2O	NUP210P1	ABCA2
DRD1	SPINK5	SEMA4C	KCNN3	CRHR1
DRD2	LILRB4	TMCO7	ANKRD27	MXD4
DSC3	IL24	FAM40A	SYT5	SEPT9
RCAN1	KLK11	PEX1	ADARB2	LIN9
TSC22D3	KDELR2	SHARPIN	SRXN1	CACNA1G
DUSP4	LILRA1	ALS2	GLUD2	KCNQ5
DUSP9	LILRB3	SHROOM3	LGALS7B	CHRD
EBF1	LILRA3	SLC22A16	FNDC5	C9orf53
TYMP	ADAP1	AKAP13	DMPK	CNNM2
S1PR1	STON1	DCAF5	AQP7	EXOC6
LPAR1	UPK1A	SH3GLB2	ARHGAP36	SUFU
EDN3	SLC35D2	MARK4	PNCK	RDH8
EDNRA	OGFR	ZNF594	KIAA1984	DUOX1
EFNA1	ZPBP	AHCTF1	ASPDH	DUOX2
EFNA3	DDX52	SMG1	URI1	CCKBR
EFNB1	CHD2	PEX19	LOC407835	EVC
CELSR2	SOX30	CARS2	EPHB2	ARNTL2
EGFR	C10orf10	DUSP19	TCP10	ESR1
EGR2	CYB561D2	CSRNP3	CGB2	HES6
EGR3	KERA	CCT6A	CGB	STEAP3
EGR4	ESM1	OK/SW-CL.58	NAT8B	NRP1
ELAVL2	ADAM30	WAPAL	LIPE	RP9P
ELAVL3	ADAM29	RPS2	CSF2RB	ERBB2IP
EML1	AKR1C4	WDR16	LRG1	TLL1
EMX1	ADAMTS13	HNRPDL	AQP7P2	HPSE2
EMX2	ADAMTS8	BTBD9	IGL@	DMRT2
EN1	HNRNPUL1	KIAA1908	ASIC4	SLC24A3
EN2	KATNA1	QKI	PAX4	OSBP2
ENO3	BTN3A2	NKAIN2	MANEAL	TPRA1
EPAS1	BTN2A1	NEK11	HES5	C8orf73
EPB49	CD160	SSH2	NOSTRIN	ADAMTSL4
STOM	CLASRP	TRIP10	SAG	LEF1
EPHA3	SLC7A9	TPGS2	TRIM38	NTN4
EPHA5	TBC1D8	ACBD4	SBSN	DSCAML1
EPHA8	PTP4A3	NPEPL1	TNNC2	CHAT
EPHB1	CHI3L2	CIRH1A	MEIS3	RAB6C
EPHB2	FAM107A	XBP1	TGM2	SPTBN4
EPHB3	INSL6	TYMS	DPEP2	FGFRL1
EPO	LZTS1	ATF3	C18orf63	CASP2
EPS8	MAP4K1	CERK	KCNB1	GATA4
ERBB4	INMT	APBB3	POU3F1	PP13439
EYA4	WIF1	MYNN	HLA-DQB1	DACT2
ERG	KLK8	BRWD1	MZF1	MAN1C1
ESR1	CHM	ZBTB34	TAL1	MMS19
ESR2	PROSC	TSC22D1	F7	TTYH2
ESRRG	CHML	FGFR2	MPO	DPH1
ETS1	GALNT6	SMG7	MYH7	SLC26A10
ETV5	BIRC8	B4GALNT4	PTH1R	DUSP2
MECOM	PMF1	BACE1	TH	ZIC4
EVX1	GPR45	BCL9L	THBD	KAZALD1
EYA2	PTGDR2	PAM	CRYAA	ACHE
EZH1	FILIP1L	SMEK1	L1CAM	FAM46A
EZH2	SP140	PSD	PAX3	PPM1K
F13A1	PXMP4	KIAA2013	PON1	BTBD6
FANCE	NRM	PLEKHH2	SLC5A5	ADAMTS14
ACSL1	PRR4	ZDHHC17	AVP	PP7080
FBN2	IL17F	SLC35B2	F12	MED12L
EFEMP1	CHRM1	C1orf144	IL11	SCD5
FBP1	KRT71	SPHK2	ADRA1D	SEMA6D
FDXR	POU6F2	MED12	CYP2A6	PANX2
FGF3	HOGA1	HELLS	CYP2A7	PXK
FGF4	ADCY7	IRF3	CYP2A13	SEPT6
FGF5	LYST	PMS2	GAST	NTRK2
FGF8	RPUSD1	IQGAP3	GABRD	AGAP4
FGF9	SLCO2B1	DDB2	GRIN2D	MYO15B
FGF10	PTH2	KLK13	HTR6	STEAP4
FGF11	GPR182	RBBP6	LHB	DACH2
FGF14	CHRM4	MGAT5B	OPRD1	ARHGEF3
GPC5	MGAT4A	SGCE	OXT	BEST2
FOXG1	TMC6	HIF3A	NCCRP1	SEPT8
FOXF1	VSIG4	OLFML2A	IGFL4	CLIC6
FOXF2	SLC52A3	CES1	OR10AD1	LOC729040
FOXD1	CHRM5	SLC43A2	KRTAP5-2	CSPG5
FOXL1	CTRC	UHRF1BP1	C9orf173	GTF3C3
FOXE3	PHB2	BIRC5	SLC30A2	CACNA1C
FOXJ1	CHRNA1	INTS8	LRRC55	SMCR5
FOXC2	TUBA3D	PIGG	LRRC52	CDCP1
FOXE1	SYNPO	MAP3K6	FRG2	ALOX15B
FOXD2	CHRNA2	ZFAT	C1orf130	PPARGC1B
FLI1	CMTM1	PCBP2	KRTAP5-6	C4orf49
FLT1	CHRNA3	OTUD1	KRTAP5-3	F3
FLT3	ADPRHL1	MARK2	DCAF12L2	MYEOV2
FLT4	SDSL	FLNB	PLIN5	TJP2
FOSL2	HENMT1	FLNA	SST	IL17RD
FRZB	FAM83F	FN1	SSTR4	SYNE1
GAST	SLC35A4	SYBU	TF	LRRC7
GABRA2	LINC00313	AP3D1	ACR	SEZ6
GABRA4	UCN3	ARAF	CCNE1	GAS2L2
GABRB2	SIGLEC11	FGFR1	TNFSF8	MTA1
GABRD	CHRNB3	NFYC	DUSP9	SLC8A3
GAD1	CGB1	RPL5	MEGF6	TAC4
GAD2	CHRNE	MEF2A	ELF4	CACNA2D3
B4GALNT1	NLRP3	KLF8	FAT2	TTLL11
GALR1	SLC22A9	SMARCC2	FLNA	ACVR1C
GAS6	CHRNG	PHC1	FLT3LG	NPB
GATA2	PGLYRP3	DNM1L	HCRTR1	PIK3IP1
GATA3	GALNT13	PTK2	TNFRSF9	BRSK2
GATA4	PNMA5	DCAF11	ALPI	IL1RAP
GATA6	SLAMF6	DTNA	ALPP	LPPR4
GBX2	OSBPL5	RPS6KA2	BMP8B	ABCC4
GDF10	C1QTNF3	EIF4G3	CD79A	CYS1
GDNF	C1QTNF4	CORO1A	CKM	WNK2
GEM	C1QTNF6	RXRB	CRYBB1	EGFL6
GFI1	C1QTNF7	SUPT5H	CST1	GRIK3
GFRA1	EPB41L4A-AS1	TWF1	ELANE	GRIK2
GFRA3	TSGA13	MAP4	ENPEP	TRPC6
GHSR	ADCY9	ZNF589	FMOD	ABCA5
GIPR	NT5C3L	POLR2J2	HPCA	SLC6A20
GJB2	CCDC124	GPD2	HOXB3	TP53INP2
GLP1R	SLC26A7	LDLR	HRC	LRRC4
GLRA1	ATG4A	DNMT1	LGALS7	AGXT2L1
GLRB	RAB42	VARS2	TACSTD2	ABCG4
GMPR	SLC25A26	LIMA1	MFNG	DMRTA2
GNAI1	PCMTD1	PIDD	MST1R	CD177
GNAS	GPR146	GIT1	MYBL2	KIAA1804
GNAZ	FCRL3	ZNF747	NPPB	NR3C2
GP1BB	SLC5A11	EPB41	PDE2A	WNK4
GP5	ALPK2	ADAMTS6	PLEK	PDE1B
GPM6A	ARL11	GOLGA4	PPY	FAM3B
CCR10	C3orf24	CTSA	PYGB	RNASET2
GPR6	CKM	SATB1	SLC5A2	TTC21A
NPBWR1	NXNL1	KIF3A	SLC6A12	NRXN3
PRLHR	CTHRC1	COPS2	SLC34A1	ADAMTS20
GPR12	CKMT2	AP1M1	SNTA1	CHSY3
UTS2R	SLC22A12	BCKDHA	SYCP1	FNDC1
GPR25	DNTTIP1	POLQ	TLR2	CHRNA7
GPR26	DIRC1	ARNT	KCNAB2	MYB
GPR27	FMO9P	ECI2	CAMK1	CERKL
MLNR	TM4SF19	CSMD2	FOXS1	ABLIM2
GPR39	ACSM1	HNRNPR	HABP2	GPRC5C
GPX7	C8orf34	ELK1	TNFRSF18	GFOD1
GRB10	PANX3	MALAT1	CARTPT	SYBU
GRIA2	IL22RA2	ABI1	NCAN	VSIG2
GRIA4	FAM129A	HADH	DPEP1	C1orf159
GRIK1	MAS1L	PRPF3	ESRRB	APBB1IP
GRIK3	APOA5	VWA5A	MYT1	LIMS2
GRIN1	HSPA12B	MAP3K4	NRTN	FEZF2
GRIN2A	LEAP2	MAPK13	TCF15	KIF26B
GRIN2B	LRG1	JRKL	NPHS1	ARHGAP8
GRIN2C	ACAP3	BRCA1	KCNQ4	ANTXR1
GRIN2D	ARAP1	HDAC3	CRLF1	MCOLN3
GRM1	AGAP2	SYNJ1	PTGDR2	FLJ11235
GRM2	CATSPER1	CFLAR	KCNJ9	NBLA00301
GRM3	MIA2	TNFRSF10C	PIK3CD	TMC6
GRM6	SCGB3A2	MFSD11	BCL3	RIN3
GRM7	SH2D1B	CLN3	GPR4	HAP1
GRP	DCD	ENTPD4	FFAR2	ANKRD53
GSC2	MRGPRX2	CD3EAP	PLXNB3	FMO5
GSN	MRGPRX3	TNPO2	KCNA10	ZFP64
GSTM3	MRGPRX4	RBMS3	NKG7	GALNT14
GUCY1A2	CIB3	TXNL4A	KCNK7	POLM
GUCY1A3	TAGAP	POLE2	TSPAN1	NECAP2
GUSB	AP2M1	DLC1	PDZK1IP1	FNBP1
GUCY2D	AP2S1	TAF2	FSTL3	HOXC13
H1F0	TMC2	RALGDS	TBX10	CRYL1
HABP2	RLN3	TGOLN2	NTF4	PPP1R3E
HBA1	RFFL	PIK3R3	PROP1	LRRC56
HBQ1	CLC	DLG4	PROCR	TMEM185B
HBZ	CLCA1	COPS3	VPREB1	PLEKHH3
HCK	CLCN1	ATXN7	ZP3	ADM2
HCRT	CLCN5	SESN1	AKR7A3	FZD5
HCRTR2	LINC00161	ADCY3	FOXE3	GBF1
NRG1	GDEP	IGSF1	MID2	MFSD7
HHEX	MUCL1	MOCS1	KCNE1L	LEPREL2
HIC1	GPR62	RAD51D	SPO11	FAM113A
MNX1	EXOSC6	CASK	PSORS1C2	CCNO
HLF	PRAP1	SH3GL3	C6orf15	DENND2D
HLA-F	ZNF511	NCOA3	GABRP	NUDT18
HLA-G	MSS51	PLD2	UBL4A	ZNF446
HLX	CLCN7	STX16	GAPDHS	RAB3IP
HMGN2	CLCNKA	INVS	ANKRD1	LONRF3
FOXA1	CLCNKB	USH1C	TCL6	HCK
FOXA2	MMP21	FOXO3	TEKT2	KLHL22
ONECUT1	ANKRD22	STAM2	SLC8A2	MINA
TLX1	LYZL2	UBE4B	ZMYND10	CRISPLD2
TLX2	CLIC1	ULK1	WNT16	MFSD2A
HOXA1	CLRN3	TULP3	HPCAL4	SPRYD3
HOXA2	CLK3	RTKN	RAB9B	MPND
HOXA3	SERPINA3	DEAF1	THEG	PAQR4
HOXA4	OR5P2	TACC1	LY6K	IMPDH1
HOXA5	CLN5	DIAPH1	ARHGEF38	RPS6KL1
HOXA6	PIH1D2	SEL1L	TMEM161A	LOC338651
HOXA7	FAM55A	CD55	TMEM74B	RUNDC3B
HOXA9	AMICA1	LDB2	GIMAP5	DLK2
HOXA10	CLPS	PCYT1B	TREM1	SPEG
HOXA11	CLTB	SLC12A4	UNC93A	TRIM9
HPCA	SDR9C7	MDFIC	SLC7A10	LOC100129917
HOXA13	C12orf54	ZNF214	F8	SH2D3C
HOXB1	GTSF1	ZNF215	SEMA3G	LOC440894
HOXB2	KRT74	ASH2L	SLC17A7	PDE1C
HOXB3	ERP27	NBN	PCBP4	RASEF
HOXB4	SPIC	ADAMTS1	LRFN2	CPZ
HOXB5	TEX29	CDC40	CDH22	FAM70A
HOXB6	CSNK1A1L	PITRM1	FOXA2	FAM120B
HOXB7	RXFP2	CTNND1	ADAM30	SLFN13
HOXB8	SLAIN1	MRPS22	GALNT9	CNTNAP5
HOXB9	SPACA7	TRPC4	HAPLN2	C1orf145
HOXC4	TDRD9	GNAS	GFRA4	VWCE
HOXC5	PLD4	SLC11A2	LIN7B	SUSD1
HOXC6	RNASE11	DEDD	IL25	FLJ32154
HOXC8	TPPP2	CACNA1F	SLC13A3	HCG4B
HOXC9	RNASE8	CDK11B	HAPLN4	SP8
HOXC10	NOXRED1	CDK11A	DENND2D	SLC39A4
HOXC11	JDP2	UTP11L	WNT4	MLF1
HOXC12	ACOT4	ADSL	CYP19A1	C20orf166
HOXC13	CCR1	LDB1	ALPPL2	MXD3
HOXD1	CCR3	HNRNPU	MFRP	CYB5D1
HOXD3	CCR6	BIN1	KCNA7	ZNF575
HOXD4	CCR8	B4GALT6	PLEKHN1	TCP11
HOXD8	PLA2G4E	HYAL2	SYT3	CLIP4
HOXD9	CCBP2	C17orf81	LAT2	GGN
HOXD10	NRN1L	TCFL5	CNFN	COX6B2
HOXD11	C16orf78	SMAD5-AS1	RHOXF2	ZNF132
HOXD12	ADH1A	AES	IGSF21	ZFYVE27
HOXD13	CMKLR1	EPN1	PNMA6A	ACO1
HPGD	IQCK	TTC4	TOX2	DENND3
HSF2	ZG16B	IRF7	PPP1R16A	LOC643923
HSF4	PRSS30P	LYPLA1	CGB5	RALGDS
HSPA1B	PAQR4	DDX47	DMRTB1	AFAP1L1
HSPA2	ABCC2	EED	SCRT2	SLC37A2
HSPA6	FAM100A	DMTF1	CGB8	GRHL3
HTR1B	SNX20	MINPP1	TRIM15	LTBP4
HTR1E	SLC38A10	ZNF236	NLRP12	OSR2
HTR4	ZPBP2	SELK	CGB1	TSPAN14
HTR5A	KRBA2	VAPB	TSSK3	STBD1
HTR6	CNTD1	MTF2	SLC26A9	SRP68
HTR7	WFIKKN2	KDM5B	HSPA12B	TRIM11
TNC	SPACA3	SUCLA2	IP6K3	RGMB
ICAM1	SGK494	DNAJB5	VSTM2L	CAMKV
IRF8	GGT6	RGS7	GAB3	RGS3
ID2	SMCR7	LYPLA2	RLN3	NOTCH2NL
IGF2	SLC5A10	TAX1BP1	LRRC15	PRSS36
IGFBP1	LOXHD1	RER1	PTPRU	CLIC5
IGFBP3	INO80C	CCDC94	AMOT	C2orf18
IGFBP5	CNGB1	VEGFA	CITED4	C2orf88
IGL@	ACER1	TRIO	SLC26A1	EFCAB4A
IHH	ADH1C	HTATIP2	TMEM190	MATN2
IL1RAP	CNGA2	MDM2	GNAT1	ADAM15
IL7	OSCAR	HOMER3	DUSP10	WNT11
IL11	CNGA3	MOB4	LDHAL6A	MOB3C
IL12RB2	NLRP8	MAP4K4	CADM4	TMC8
IL15	NLRP5	TM7SF2	CACNG6	MDGA1
IL15RA	WDR88	LEPRE1	TMIE	TRIM72
TNFRSF9	TMIGD2	GLS	OTOS	PLCD1
IMPDH1	ZNF57	RABEP1	ATP1A3	FLJ33544
INHBB	JSRP1	WDR6	C3orf30	SOBP
INPPL1	MOB3A	PLEKHB1	BEST4	AK5
INSRR	LRRC25	WHSC2	DNAJB8	RCAN2
PDX1	ZNF792	MED23	ESX1	ANKRD35
IRF4	HSPB6	LPHN2	HOXA3	SLC4A11
IRF5	CNN1	EIF4G1	HOXA10	GORASP1
ISL1	C19orf47	TAP2	IL28A	ZEB1
ITGA4	B3GALT6	MRPL12	NBPF15	RNF175
ITGA9	CNR1	RBFOX1	C19orf59	DCTN3
ITGB2	MAB21L3	RBM5	RAB37	MAPT-IT1
ITGB3	CNR2	FADS2	PTH2	CCDC78
ITGB4	CNTF	MTAP	C20orf85	LOC100129455
EIF6	ATP6V1G3	EIF3K	CCDC60	SEMA3B
ITPKA	ASB17	MRPL39	ACTL9	DUSP5P
ITPKB	DMBX1	CDK5RAP3	FAM101A	KIAA0895L
JAG2	LRRC39	TRRAP	TMCO4	ADAMTSL3
CD82	GJB4	GH1	SLC36A2	CCNJ
KCNA1	DCST2	KLHL7	GPR142	DPYSL2
KCNA2	VWA5B1	CASP10	BMP8A	VLDLR
KCNA3	SYT2	MSTO1	TMEM61	LOC100130275
KCNA4	FCRLB	STOML1	TICAM1	HEY1
KCNA5	COL3A1	ARFGAP3	RGS12	LOC100132014
KCNA6	EDARADD	RUFY3	AMIGO3	C22orf25
KCNB1	KLF17	SCPEP1	ADSSL1	PFKP
KCNC1	C1orf182	GRHPR	SOGA1	BSPRY
KCNC2	C1orf162	EDNRB	TCL1B	LOC653602
KCNC4	COL4A2	HFE	TRIM7	CRIP1
KCND3	WFDC12	BAG1	UBL4B	OLFML3
KCNF1	SPATA25	CSAD	OR2V2	SOWAHA
KCNG1	C20orf85	SOX13	OTUD6A	INPP5J
KCNH2	SIRPD	ERGIC3	CD164L2	TNS3
KCNJ2	C20orf141	C8orf39	DEFB132	RASGRP2
KCNJ3	PROKR2	SEC23IP	FLJ45832	ZCWPW1
KCNJ4	CSTL1	KIAA1429	LCNL1	KRT72
KCNJ5	CST9L	DCAF6	ASB18	FLJ35776
KCNJ8	BPIFB6	TCEB3	EDNRA	C9orf50
KCNJ9	BPIFA3	GPN3	FUT6	AK8
KCNJ10	C20orf144	MKRN1	ART3	ZNF839
KCNK3	FAM83C	FLOT1	AQP6	ODF2
KCNMA1	COL6A3	MYO9A		BOLL
KCNN2	COL9A1	CDK14		HEATR7A
KCNQ1	TRIM43	SNX11		RTBDN
KCNQ3	AADAC	CHORDC1		AMOTL1
KCNS2	ADH6	PRUNE		LOC692247
KLC1	COL10A1	ACIN1		KRI1
LAMA3	ACMSD	PRDX5		VIM
LAMB1	REG3G	UBE2D4		MCOLN2
LASP1	PLEKHH2	GGNBP2		LOC100128262
LGALS3	ALS2CR12	LINC00338		FRMD3
LHX1	SPATA3	QARS		ACSS1
LIF	COL15A1	LSR		SYT2
LIG1	CPO	CALHM2		EXD3
LMO1	COL17A1	HNRNPH3		LHX2
LMX1A	TMEM182	MTERFD1		C9orf24
LMX1B	ADH7	AMDHD2		CES4A
LOX	CPNE4	GET4		PRDM11
LPL	FAM3D	ABCB7		AIFM3
LPO	ZPLD1	CTNNAL1		LPPR2
LRP2	LYZL4	UBE2E4P		SERHL
LTBP2	KBTBD5	ILF3		PALM2
LTBR	COPA	GANAB		RBM24
LTF	FAM131A	ZNF317		DEF8
LTK	CD200R1	C3orf19		FAM181B
LY6H	ZDHHC19	SERBP1		TFEB
TACSTD2	LRRC15	FAM108B1		FLJ37786
MAB21L1	TPRA1	METTL9		RASGEF1A
MAL	UROC1	REXO2		DLX1
MAPT	GRK7	TMBIM4		CLVS2
MATK	TMEM207	PCDHB17		NBPF3
MATN2	IL17RE	USP15		LRTM2
MBNL1	RTP1	CASP8AP2		NDRG1
MBP	C3orf45	MARK1		LOC151009
MC3R	H1FOO	TMEM189		GREM1
MCAM	CORT	FOXJ2		C15orf56
MCC	TMPRSS11B	SYNCRIP		DCBLD1
ADAM11	ENPP6	SLC25A14		HSPA1A
MDFI	IL31RA	HMCN1		ZNF7
MEF2C	PPARGC1B	UCHL5		LOC100129572
MEIS1	CAPSL	FBXL5		LOC100129434
MAP3K5	JMY	CIZ1		REM2
MEOX2	COX6A2	LOC51145		OLFM1
MET	ADORA1	JKAMP		C9orf25
MITF	CMBL	PPA2		EGFLAM
MLLT3	TMEM174	C15orf63		C1orf204
MLLT6	SHROOM1	CLDND1		C7orf41
NR3C2	C5orf24	NIP7		NEBL
MMP2	ADORA2A	DCAF13		PCDH19
MMP11	RAET1E	CDC16		PID1
MMP17	HUS1B	HSD17B7P2		FLJ22184
MN1	TRIM40	PCDHA6		PPM1M
MPP2	DPCR1	CYB5R2		LNPEP
MPP3	CPA1	PTMAP7		STXBP6
CITED1	CPA2	USP25		LOC729173
MSI1	CPA3	COL8A1		LOC100130857
MSX1	C7orf34	CHFR		CCDC74A
MSX2	ADORA2B	TNIK		LINC00528
MT1A	CPB1	EIF2A		FAM123A
MT1E	CPB2	FAM54B		PACS2
MT1G	C7orf45	HMGA1		ANKRD13B
MT1H	ASB10	FBXO11		CNTLN
MT2A	PRSS58	VKORC1		C1orf51
MT3	CPM	GLOD4		PHACTR3
MX1	SRCRB4D	EML4		SVEP1
MXI1	CPN1	ERBB2		RSPO4
MYB	ASZ1	SLC24A2		ZACN
MYBL1	ZNF572	GABARAPL3		FOXP1
MYF5	CPS1	IL1RAPL1		LYPD1
MYF6	CPT1B	MPZL1		SCUBE2
MYH11	CKS1BP7	MRPS21		AFAP1L2
MYO5A	ABRA	COMMD8		LOC100128028
MYO10	TMEM71	TRPS1		GCAT
MYOD1	SGCZ	RGL1		SPRN
NBL1	DCAF4L2	ATP2C1		CROCCP2
NCAM1	C9orf116	MTCH1		LOC100132207
NCAM2	C9orf41	ZNF3		LOC642648
NEFM	C9orf131	EIF2AK3		PLXNA4
NEFH	OR1N1	FBXW2		LOC645195
NELL1	MAGEC3	LINC00476		IFI30
NEFL	BEND2	CHPT1		ACER2
NEK3	DCAF12L1	NME9		LOC388692
NEUROD1	CRH	RBM8A		LOC100133029
NEUROD2	CRHBP	ICOSLG		LOC100128950
NEUROG1	OTUD6A	SENP7		FLJ42220
NFATC1	MAGEE2	IMPA2		LOC100131490
NFIA	ACTRT1	PPP4R1		CCDC136
NFIC	ADORA3	STK36		LOC100132966
NFIL3	CRP	TXNRD2		KIAA1875
NFIX	KRTAP13-1	GPRC5B		BTBD11
NFKB2	TCP10L	MRPL46		CPLX2
NGF	RNF113B	PINX1		C9orf139
NGFR	ASB11	PECR		DUSP8
NHLH2	ASB5	CBWD1		HLA-F
NKX2-2	ASB9	CUL4B		LOC100128239
NKX3-1	CRX	TRIM37		LOC100129484
NKX6-1	NEK7	BRD7		C3orf72
NMB	GATA5	ARID4B		LOC100129223
NOS1	BPIFA2	FAM120A		LIPG
NPY	ZBTB46	TMEM242		RUSC1
NOV	WFDC3	CHEK2		TRIM36
NPAS1	CTCFL	USP21		RUSC1-AS1
NPAS2	SAMD10	CSNK1A1		DMKN
NPPC	ABHD16B	PP13		IGFL2
NPR3	C20orf160	FLAD1		LRAT
NPTX1	SOGA1	WRNIP1		LOC100128699
NPTX2	ANKRD60	PHF20		DYDC1
NPY2R	SUN5	SUPT7L		LOC100131099
NPY5R	ADAMTS14	VEZT		DKFZP779L1853
NRGN	KRT72	AS3MT		ATP8B3
NT5E	SRXN1	SPRY4		DNAH1
NTF4	DEFB127	SH2B1		LOC100131066
NTRK1	C20orf79	DBIL5P		LOC100129931
NTRK2	WFDC6	PPPDE1		LGI2
NTRK3	C20orf173	PML		SYTL1
ROR2	FAM65C	IKZF4		C3orf64
NTSR1	CST11	CUTA		MCAM
OCA2	DEFB129	ARID1A		FLJ44477
OPCML	PABPC5	ST7		ADCY4
OPRD1	SREK1	MKNK2		LOC100129840
OPRK1	C20orf151	GNB1L		SRCIN1
SIX6	C20orf152	C21orf91		LOC100128517
OTX1	CRYAA	TRAF3IP1		TTLL7
OTX2	R3HDML	PATZ1		SLC25A48
OVOL1	C5orf20	SLC17A5		LYNX1
OXT	CRYBA1	IFT122		LINC00268
P2RY2	CRYBA4	ATP6V0A4		TMEM44
PAK1	CRYBB1	MFF		DPF3
PAK3	CRYBB3	VPS53		KY
PAPPA	CRYGA	CALD1		LZTR1
PAX1	CRYGB	CASC5		LOC401286
PAX2	CRYGC	SRRT		LOC100131662
PAX3	SLC34A3	DPH5		LCNL1
PAX4	ITLN2	ST20		ZCCHC23
PAX5	ASB14	NKX3-1		PNPLA5
PAX6	CRYM	NADK		CCDC108
PAX7	C10orf129	FAM162A		LOC100130027
PAX9	CRYZ	ACADM		CYP26C1
PCDHGC3	FRMPD2	REPS1		ATP8A2
PCDH7	VTI1A	ARID1B		KCNT1
PCDH8	CSF1R	ELF2		LOC440896
PCSK1	CSF2	SH3GLB1		LOC100129069
PCSK5	CWF19L2	NAPRT1		PDIA6
PCSK2	CSF2RB	ELMOD3		B4GALNT1
PDE1C	CSF3	RAB24		FAM196A
PDE3B	CSF3R	CNDP2		TBX15
PDE4B	ST13P5	ABI2		RALB
PDE8A	OR10A5	HGS		LUZP2
PDE1B	DNHD1	LMBR1L		LOC401433
PDGFB	AMDHD1	CHTOP		SCUBE1
PDGFRA	SLC2A14	EIF2D		CILP2
PDK4	FAM101A	CGN		C7orf46
SLC26A4	LINC00477	DAB1		NELL1
PENK	CSHL1	RANGRF		LOC100129060
PFKFB3	BEST3	RNF20		CATSPERG
PGR	KRT80	BIRC6		LOC100133190
PITX1	A2ML1	USP28		FHOD3
PITX2	CSN1S1	POU5F1B		LOC100130547
PITX3	CSN3	TM9SF3		FMNL3
PKD2	ST13P4	C21orf7		LOC100130236
PKP1	RDH12	MYO5C		FAM159A
PLAGL1	SERPINA12	GPHN		LOC554223
PLAUR	CSNK1D	INPP5A		LOC63930
PLCD1	CSNK1E	RPLP0		CIRBP
PLEC	ABHD12B	HSP90AB1		ABHD12B
PRRX1	C14orf166B	MRPS10		SP7
PNMT	CSNK1G2	EPC1		C4orf22
SEPT4	C15orf43	MCM7		ALDH1A2
POLR2A	LYSMD4	VPS39		TRAPPC9
POMC	GCOM1	APP		FOXI2
PON1	C15orf32	POLL		LOC100128063
POU3F1	TMCO5A	BRI3BP		LOC100129697
POU3F2	SPATA8	KARS		PPP1R13L
POU3F3	ADRA1D	EXOSC5		LOC100127909
POU3F4	ZSCAN29	CDC42SE1		LOC100132481
POU4F1	OTOA	TPX2		LOC100127910
POU4F2	TEKT5	BLZF1		LOC100128077
POU4F3	NCAN	FTCD		NBEAL2
PPARA	IL34	CEP70		TTBK1
PPARG	ZNF597	MPPE1		FOXP2
PPP1R1A	TMED6	FLJ13197		ZNF704
PPP1R3C	CD300LF	CRTC2		UNC5A
PPP2R4	EFCAB3	SLC2A8		PPP2R5C
PPYR1	SLC47A2	TERF2IP		BNC2
PRKCA	CCDC42	TTC9C		ZFHX4
PRKCB	UNC45B	NUSAP1		RNF19B
PRKCE	CST1	C10orf2		ZNF324B
PRKCH	ADRA1B	CLSPN		SYPL2
PRKD1	CST2	TRERF1		PDE2A
PROC	TMC8	BDP1		C9orf96
PROX1	LRRC37BP1	CD164		NR2E1
PRPH	KRT25	CDHR5		SLC31A2
RELN	CST4	PELI2		CCNI2
HTRA1	CST5	GNPTG		NR4A1
KLK10	STARD6	TNKS2		GLDN
PSMA1	CST6	HIPK3		C1QTNF1
PSMB2	DSG4	RANBP9		SLC13A5
PYY	CHST9-AS1	GFER		LRRN4
PSMB9	CSTA	MGEA5		CD83
PTGDR	C19orf18	SENP6		PLA2G15
PTGER2	KLC3	NOTCH2		GNB5
PTGER3	LYPD4	ZNF277		ROPN1
PTGER4	HIPK4	KANSL3		ANKMY1
PTGFR	NLRP4	PAPOLG		LBH
PTGS1	CAPN12	RUFY1		SMCR7L
PTHLH	TICAM1	DNAJC10		MARC2
PTH2R	FAM187B	RBM14		BVES-AS1
PTPN2	ZNF558	AHCYL1		TMEFF2
PTPRB	C1orf127	AGSK1		PRR5-ARHGAP8
PTPRF	UBE2U	LOC727751		KIAA1191
PTPRN	LINC00337	LOC727849		SERHL2
PTPRN2	HFE2	MNT		MARCH1
PTPRR	PM20D1	TBC1D2		CAMTA2
PTX3	C1orf150	ZBTB37		RNF123
RALB	CCDC27	NRBP2		UAP1L1
RARRES2	GLIS1	MYCN		KANK1
RASA2	DCST1	PPIL2		PTPN5
RASGRF1	IL23R	MPV17L2		FAM115C
RBP4	CTLA4	RTN4		EBF3
RET	SHISA4	OCIAD1		RAPGEF5
RFX4	BNIPL	GLYR1		ALCAM
RGS10	WDR65	TRIM58		C19orf55
RGS16	C1orf210	RAB34		SEPT3
RING1	CCDC17	SPAG9		CORO6
RNF2	C1orf64	ABCA7		P4HA3
RORB	PYHIN1	TTTY14		ENTPD6
RRAD	FAM71A	ELP2		HDAC11
RTN1	ADIG	DDX31		TMEM130
RXRG	GTSF1L	LOC402469		BID
RYR2	WFDC5	CDRT1		TAGLN2
S100A6	BPIFB4	MZB1		RGS22
SALL1	AANAT	CTAGE5		C21orf63
MAPK12	ABCC13	KDM3B		LRCH1
CLEC11A	LCA5L	SEC61A2		ADC
SCN4B	LINC00479	MUC1		PRSS3
SCN5A	ZNF295-AS1	UBR4		TXNRD1
SCNN1B	HSCB	HEATR6		SMTN
SCNN1G	MORC2-AS1	TRPM6		SETD8
SCP2	ENTHD1	GTPBP10		ADARB1
SCTR	DNAJB7	ABCC11		SORCS1
CXCL12	NFAM1	PBX3		DES
SECTM1	CTRB1	CASD1		UNC5B
SFPQ	TEKT4	BTBD2		AGAP2
SFRP1	CTRL	LPPR3		GLI4
SFRP4	OTOS	CPT1C		NALCN
SFRP5	PROM2	GTPBP3		IGF2-AS1
SFTPC	CTSE	PIAS2		SYNJ2
SH3GL2	ALS2CR11	CIC		RAB11FIP4
SH3GL3	SLC38A11	HIP1		RAET1G
SHH	CTSK	TRPV6		EVC2
SHOX2	MYADML	KCNIP2		ESAM
ST6GAL1	FAM82A1	CCNL1		LOC100131373
ST8SIA1	ASPRV1	RBM15		NOXO1
SIM1	UPP2	CALCOCO1		MGC23284
SIM2	WDR49	LARP4		LOC100132188
SIX1	CCDC80	JMJD8		LBX2
SIX3	C3orf22	LRRC41		ERG
SLC1A2	NEK10	CTNNBL1		GCOM1
SLC1A4	CTSZ	CTTNBP2		AAAS
SLC5A5	CCDC13	PLXDC2		LOC100127947
SLC6A2	CX3CR1	RSF1		KCNC2
SLC6A3	IGSF11	PCCA		TRIM67
SLC6A4	CXADR	NEDD4L		NELF
SLC6A7	TEX28	SART3		HEPN1
SLC6A11	C4orf26	C1orf52		CHRDL2
SLC8A3	KLB	MARK3		CTDSP1
SLC9A2	METTL19	KRIT1		ANKS1B
SLC9A3	DAB2IP	SETD4		KCNIP2
SLC15A1	BTNL9	FAM207A		BCOR
SLC18A3	CYBB	OSBPL8		TXNDC5
SLCO2A1	FAM71B	MAD2L1		LAMA3
SLC22A3	CYLC2	RAPGEF6		IRX6
SLIT1	SAMD3	ALG9		IRX5
SLIT3	PNLDC1	NSD1		PPM1L
SNAI2	RNF217	DCLRE1C		P2RX2
HLTF	CYP1A2	OLFM3		PROK2
SMARCD3	CYP2A6	PANX1		DCHS2
SNCA	CYP2A7	SLC29A2		XYLT2
SNRPE	SLC2A7	CADPS2		NTNG2
SNTB1	CYP2A13	MAGI1		SUSD3
SOAT1	WBSCR27	HDAC10		GSG1L
SOX1	AGR3	TP53INP1		C7orf58
SOX9	CYP2B6	CIITA		PODN
SOX12	CYP2C19	ADCY2		LRRTM3
SRD5A2	CYP2C8	TTC23		BOC
SST	CYP2C9	AGAP3		KIAA1324
SSTR1	CYP2C18	ABCC13		C10orf54
SSTR2	CYP2D7P1	SCGN		ITIH5
SSTR4	CYP2E1	BRE		SULF2
SSTR5	CYP2F1	MCM3AP-AS1		ART5
ST14	CYP2J2	BRWD1-IT2		LAYN
STX1A	C8orf78	C21orf88		SOST
STXBP2	CYP3A4	CEP41		EPHA6
SULT1A3	CYP3A5	CELF2		LOC100128035
ABCC8	TMEM74	SYNE2		TMEM178
SURF4	FAM91A1	SON		TMEM180
SYCP1	C8orf45	TRIM68		C16orf48
SYK	CYP4A11	RTN4IP1		FGF17
T	CAMSAP1	RBFA		ADAM12
TAC1	CYP4B1	C7orf13		PCSK4
TACC1	LINGO2	C3orf15		GFRA3
TACR1	MAMDC4	RNF32		HVCN1
TAL1	LCN6	SLC35A4		CBLN3
TAP1	CYP7A1	FAM48A		IL17RC
TBX1	TTLL11	PSRC1		TMEM54
TBCD	HSD17B7P2	GTF2IRD2		MDGA2
TBX2	CYP8B1	FOXRED1		PTGER3
TBX5	FAM154A	FAM100A		MAST4
TBX3	CYP11A1	PSPC1		DMRT1
HNF1B	CYP11B1	SCOC		LOC100129395
TCF15	C9orf84	CDK5RAP2		PAX5
TCF21	PRUNE2	DAGLB		PTGFR
TCP11	ZNF645	ZNF827		ADRA1A
TFAP2A	FMR1NB	PCYOX1L		RIPK3
TFAP2B	CYP17A1	PLK1S1		ARHGAP20
TFAP2C	AKAP14	PTMA		IRF5
NR2F1	CYP19A1	NDUFA10		ROBO3
NR2F2	RHOXF1	EPM2A		GPR158
TGFB2	MAGEB6	SNHG11		PAOX
TGFBI	CYP21A2	BBX		AQPEP
TGFBR3	USP54	PPP1R12A		ST8SIA1
THBD	SLC5A12	LRCH4		VWA2
THBS2	PATE1	NUB1		XKRX
THBS4	LDHAL6A	FAM178A		BBS5
THPO	CLEC12A	HEATR3		DHRS4
THRA	C12orf50	SRGAP3		CXCL12
TIMP3	IFLTD1	CCAR1		SMPD1
NKX2-1	DGKA	CCNY		MCTP1
ICAM5	SLC5A8	ZAK		FCRLB
TLL1	DAO	LRBA		PDE9A
TLR2	STOML3	LGI1		PLXDC1
NR2E1	FAM71D	SLC12A6		ANO1
GPR137B	C14orf49	DDX54		MADCAM1
TNFRSF1B	DAPK1	SPATA5		MYOCD
TOP1	FITM1	BRSK1		KCNAB1
TP73	TBC1D21	VANGL1		RAB40C
TRH	DYX1C1	ARHGEF2		STOX1
TRPC4	ODF3L1	MAZ		ARID3A
TRPC5	DAZL	DIP2A		RASGRP1
TRPC6	ADAD2	ZNF396		CYP24A1
TSHR	DBH	AKIP1		CMTM2
TTPA	TRPV3	DNAH3		TRPC3
TUBA4A	TCEB3C	PANK2		CDK20
TWIST1	ZNF610	NARG2		CDH6
UCN	ZNF320	HYAL3		GYG1
UCP1	ZNF781	USP48		ICAM4
COL14A1	PRR22	LOC100131506		TMEM38B
VDR	LGI4	WWC1		FAM125B
VEGFC	ZNF540	CD63		PDXK
VGF	GBP6	ENGASE		SFXN3
VIPR1	DCN	PCNT		CPT1A
VIPR2	FNDC7	MIER1		NOL4
VPREB1	DENND1B	APITD1		APLP2
WHSC2	TDRD5	ENAH		SMUG1
WNT1	C1orf177	IQCK		GADD45G
WNT2	SPRR4	NUDCD1		MGMT
WNT3	DCT	ANKHD1		WDR45L
WNT5A	CNST	CMTM4		PDLIM3
WNT6	DCTN1	HNMT		MFAP3L
WNT7A	HFM1	SNX21		VPS18
WNT7B	PAQR7	C10orf28		TP53I13
WNT8A	UBL4B	FAM174A		FLI1
WNT10B	WFDC13	MBD4		CYP27B1
WNT11	LRRN4	ZNF397		TKT
WNT9B	DDC	HAUS6		EFHD1
WT1	AKR1C1	NICN1		BAIAP2
XPA	CCDC116	GPR64		RPP25
YES1	TMPRSS6	UBA52		RAB6B
ZIC1	APOBEC3H	VPS37A		ZNF593
ZNF32	WBP2NL	NPHP1		WRAP73
ZNF140	LONRF2	DSCR3		FA2H
ZBTB16	AEBP1	SNTG1		CCDC56
TRIM25	C2orf57	HTR3A		LYL1
SLC30A2	OXER1	EFNA4		AGGF1
SLC30A3	FAM179A	PSEN1		NFKB2
SLC30A4	CLEC4F	CD300A		USP2
BSND	DQX1	PI4KB		RCAN1
NPHS2	DNAJB8	ADAMTS13		STXBP2
BTG2	GPR156	NUCKS1		RING1
PAX8	XIRP1	ZMYM5		C9orf86
MALL	AES	CDC45		RET
CXCR4	CHST13	WBSCR22		RRAGD
SEMA3B	TRIM60	PARP2		PDLIM4
ST8SIA4	MMAA	MTHFR		LRRC1
ALDH5A1	DEFA3	TH1L		DOK4
NR4A3	TIGD2	RPGR		NOC2L
LHX3	RBM46	NCKIPSD		ITPK1
ADAM12	DEFA4	APAF1		BMP7
FOSL1	SGMS2	NFAT5		PRR7
SSPN	CRISP1	GPSM3		RASSF5
ST8SIA2	DEFA5	SERGEF		VILL
MKKS	DEFA6	YEATS4		SSR4P1
DYSF	DEFB1	SEZ6L2		TMEM176B
AXIN1	DES	GRIK5		KCNK6
EOMES	LIX1	BPNT1		AGPAT2
FZD1	ZNF366	FAF1		CYFIP1
PIP5K1B	GALNTL5	RHBDL1		HOXD3
SOX14	RNF133	SLC44A1		EGLN1
SOAT2	GIMAP7	LOC100131138		DLX4
IRS4	BHLHA15	SEPSECS		CDK4
PRSS12	SLC30A8	MYOZ3		NKX2-1
PPFIA2	IDO2	RANBP17		COBLL1
ITGA8	KCNV2	KIF13A		ATF3
DGKZ	OLFML2A	LOC157740		ZCCHC2
DGKE	GLIS3	MCOLN1		INA
CHST1	ZNF169	VAMP7		CXXC5
CBX4	FAM47B	WHSC1L1		HCFC2
BARX2	OIT3	TRPV4		GATA3
LGR5	CLEC4C	TOR3A		PPARG
BHLHE40	HTR3C	XKR6		CLIC3
CDC14B	XAGE3	PHIP		COCH
PDE8B	XAGE5	ARHGAP17		KIRREL2
SKAP1	PSORS1C2	NPFFR2		MGC16121
UNC5C	COX7B2	MORN4		PCGF5
DCHS1	SPACA4	SEPT9		ZNF503
CHRD	NLRP6	LMLN		KIAA1984
STX11	FAM9A	TEFM		PLCG2
B3GALNT1	PTCRA	SLC35B4		HOXA10
TNK1	POLR3H	NRXN3		RIMBP2
ABCC3	DHODH	ZBTB10		HEY2
NOL4	CYB5R3	PHC3		PGM5P2
TRADD	AFM	BCL11A		HAUS7
HRK	DIO1	EMID1		ETHE1
TNFSF9	DIO2	TDP2		ISOC1
ADAM23	AFP	HBS1L		SH3YL1
ADAM15	DLG2	CACNA1H		EPB41L3
DLK1	DLG4	PRRC1		HLA-A
TNFRSF11A	AGA	KDM2B		JPH3
IL1RL2	DMBT1	HDAC9		SLC7A4
GALR2	DMD	AHI1		SHOX2
FGF18	SARDH	PPP3CB		VASH1
FGF17	DMP1	SLC25A13		NRP2
ALDH1A2	DMPK	RHOT1		ALDH1A3
PER3	DNAH5	RPP21		CDC42EP1
ST3GAL5	DNAH8	TRPM3		PITX1
SYNJ2	AGER	SASH1		CHODL
ARHGEF7	DNASE1	VRK2		IRF1
SPHK1	DNASE1L2	FUT10		MARCH9
CCNA1	DNASE1L3	SLC25A23		SYNGR3
CACNA1G	DNTT	EXOSC9		MT1E
PHOX2B	DOCK1	B4GALNT2		PADI2
RAB7L1	DPP6	CASC2		C5orf62
SKAP2	DPT	ANKAR		TMEM62
BAIAP3	AGRP	MBD1		ETNK2
CDK5R2	SLC26A3	DHX36		DNAJC4
H1FX	ARID3A	SLC27A3		PLEKHO1
TRPA1	DRP2	CCDC112		RSRC1
NOL3	DSC1	UCKL1		ASIC4
HAP1	DSG1	MUC17		GRIA2
SOCS3	AGT	ACAD11		HOXB-AS3
CH25H	DSG3	VPS13A		SNX24
PSTPIP2	ECM2	VPS13C		OSMR
SYT7	AGTR2	TFEB		PHYHIPL
CLDN6	APLNR	KCNH2		SMOC1
INA	GPR183	SYT14		GPNMB
SLC16A6	AGXT	BPHL		AUTS2
KCNQ4	ECH1	U2AF1		LHX4
SYNGR3	ECM1	PTGS2		MMP28
NEURL	EDNRA	DEPDC5		MYCL1
SLC6A5	EDNRB	NOX4		HCG4
DGKI	PHC2	CASP9		CYP2U1
MAP3K13	PLAC4	SLC35A1		NBL1
KCNAB3	KRT24	HSP90AA1		PROM1
DCLK1	EFNA3	ABCC10		OCA2
MTA2	EGF	CNNM3		FAM212A
MSC	MEGF8	ANKRD10		NKD2
CRLF1	SDR16C5	HNRPLL		B3GNT9
CACNA2D2	EHHADH	GTF3C5		ITGB1BP1
MAPKAPK2	KRT78	TMEM104		F12
STK17A	RILPL2	AMBRA1		NRL
BCL7C	DNAH10	ALKBH5		GUCY1A3
KLF4	FAM71C	PQLC2		GDA
CER1	RMST	MIOS		CD47
SLIT2	C12orf12	ZNF434		MLXIPL
LHX2	EEF1DP3	GTPBP2		C9orf9
KL	AHSG	KANSL2		PRRT1
NRXN2	LINC00311	COMMD4		TMBIM1
LIPG	LDHD	FLJ20464		KCTD12
ARHGAP29	ACSF3	MTMR12		C4orf42
CYP7B1	NSMCE1	BCAS4		EYA2
HAND1	EIF4E	C1orf27		OLA1
NTN1	AIF1	PARP16		NEIL2
ECEL1	CELA1	SSH3		TAP1
HAND2	ELANE	ZNF692		ADCK2
CHST3	ELAVL4	TMEM70		TBXAS1
ONECUT2	C19orf59	TTC12		OGFR
CHST10	DAND5	TMEM132A		ARSA
TBX4	NLRP7	TMCO3		EFEMP1
ADAMTS2	FAM129C	RMND1		PDZRN3
NRG2	ELF2	C17orf80		PRDM2
IGDCC3	ELF3	CCDC40		HOXD1
CXCL14	TMEM61	MRPL20		SLC9A3R2
GABBR2	A2M	C14orf118		NR2F2
SPAG6	CDCP2	ATG16L1		FBXO2
CARTPT	TXLNA	FLJ10038		CBX4
GDA	SLFNL1	C9orf68		HAGHL
CELSR1	ELK2AP	SENP3		ITPKB
KLK4	APOBEC3A	ZNF691		TEX30
SNCAIP	ELK4	RBM10		EXOC7
RGS6	C2orf51	FBXO4		PDGFRA
GNA14	ANKRD23	CXorf57		TESC
MICAL2	KCTD6	SLC38A4		DGAT2
PDE4DIP	LIPH	SAMD4B		SLC22A18
FAM131B	ARL13B	CCDC76		GATA2
ProSAPiP1	HTR3D	ATP6V1D		PARD6A
MTSS1	OSTalpha	MANSC1		STXBP1
PHYHIP	PLD6	ELP3		MAP3K6
SPOCK2	ARHGAP27	FAR2		NT5E
ZEB2	EMP1	AIG1		CDKN2A
MAGI2	SPNS3	DALRD3		TOMM6
RHOBTB1	EMP3	ELAC2		MEPCE
ZBED4	ZSCAN4	RNF220		ETV4
LPPR4	TIGIT	GNL3L		GYPC
SNAP91	TMEM154	PYCR2		BRF1
SV2B	ENG	DCUN1D2		SQRDL
MAFB	GAPT	C1orf106		ACD
CD302	OSTCP1	TBC1D13		NLRP1
HS3ST3B1	C7orf33	SRSF10		ANKRD44
HS3ST2	PRSS55	KIAA1033		GNAI2
HS3ST1	NAIF1	PTBP3		LIME1
FGF19	ZCCHC5	SLC38A2		C3orf52
PPP4R1	PAGE2	VPS52		PCBP4
BCL2L10	EPB41L1	THNSL2		OBFC2A
HCN4	EPB41L2	TOR1AIP1		CPSF1
PTPRU	EPB42	C7orf43		TRIM47
TSPAN5	CERS3	TMEM19		ETS1
ARL4C	PDILT	RBM41		EPB49
YAF2	NLRP11	IDH3B		TFAP2A
MBNL2	SLC44A5	TNFAIP8		RASD1
PLXNC1	EPHX1	MED4		GRK5
FARP1	LINC00116	ACOT2		LYPD6B
SORBS3	EPOR	SPG20		SEMA4F
MPZL2	AQPEP	BRIX1		DRAM1
OLIG2	ERV3-1	DNPEP		TGFB3
HCG9	ABCA3	RBM7		S1PR1
ABCC4	ESRRB	ABCB8		MOXD1
IRX5	ALAS2	MKLN1		PODXL2
RAMP2	EVI2A	SIRT7		NDNF
RAMP1	EVPL	FAM49B		KIAA1199
RAMP3	ALB	AGPAT5		SEPT10
APC2	EXTL1	RSBN1		ABCB4
CCNO	F2	ACER3		CAMK2N1
NMUR1	F7	STAU2		COQ2
PKDREJ	F9	BSDC1		MT1G
NPM2	F10	MLST8		DUOXA1
KLF2	F12	NSUN4		HLA-G
CACNG3	FABP4	FAM214B		KLHL14
CACNG2	FABP1	MOB1A		DBC1
NDRG1	FABP2	LMBR1		FMNL1
ST3GAL6	FABP7	TMUB2		C2CD2L
SPON1	FANCA	SLC41A3		RAB3IL1
LRRN2	FANCC	RAB3GAP2		ARHGAP29
BAIAP2	FANCB	MTBP		GABRA2
MERTK	FANCG	TBC1D15		SLC10A7
HOXB13	FAP	MED17		FAM89B
C1orf61	FBLN1	FGGY		EVL
MYBBP1A	ATAD3C	QRSL1		RAPGEF4
FBLN5	FAT2	ADCK4		PAK7
ANP32B	GJD4	PARVA		STMN3
HTATIP2	HYLS1	SPATA5L1		LRP11
SLC34A2	TPCN2	EXOC7		TBX3
MAB21L2	SPATA19	EIF2B3		SLC29A4
ST6GALNAC2	MS4A15	RABGAP1		MGC39372
RASL10A	PPP1R32	PGAP1		PPP3CA
DMRT2	GDPD4	CCPG1		BHLHE41
LBX1	SHANK2-AS3	SUN1		NOP14
KLF1	SPERT	NGLY1		SCML1
CGREF1	CCDC11	NT5DC2		CNTD1
CSPG5	HEPACAM	MAEA		EPHA4
PNMA2	CCDC89	LIN28A		SLC48A1
TBR1	FCAR	POLR1B		ALDH1L1
SIX2	FCER1A	PARP6		SPATA2L
RAI1	MS4A2	VASH2		CCDC19
CHL1	FCER1G	CNOT10		PCDH20
GJB6	FCER2	TARS2		RSPO2
ALDH1L1	FCGR1A	DBNDD1		HS1BP3
PDE10A	ZNF438	UQCC		RAMP2
HPSE	ZNF485	UNKL		P2RX5
ME3	ALDH3B1	ZNF767		SLIT1
C1QL1	C10orf111	SLC38A7		GPR161
PROKR1	SLC39A12	ATAD5		PCDH17
GPR83	LRRN4CL	TOMM40L		PIK3R5
PPARGC1A	ALKBH3	INPP5B		GDF10
JTB	GPR114	ASCC2		HTR2C
PAPOLA	FCGR2A	USP36		CYTH3
SMPDL3A	LINC00305	HSD17B7		ELMOD1
PDIA5	FAM26D	EHMT1		GPR155
RAB40B	GSTA5	SMG9		PDZD7
SLC38A3	OPN5	DPH3		NPHS2
SLC27A2	GPR115	DDX27		ABCG1
CCDC85B	GPR116	JMJD4		LRRC43
VAX1	FGD2	AGBL3		C8orf56
RIPK3	ARMC12	BCAS3		FOXI1
B3GNT1	FCGR3B	EDEM3		ENTPD3
TRIM31	HIST1H2AA	C9orf86		KLF4
STMN2	LINC00518	SSU72		BRD1
ADAMTS8	PRPS1L1	ARMC5		GNAO1
ADAMTS5	FCN1	HP1BP3		TMEM196
PRSS23	GPC2	PKNOX2		PQLC1
PTPRT	ALDH3B2	FASTK		ITGA9
CDC42EP1	FCN2	TINF2		CABP1
BVES	C7orf41	C14orf159		SLC22A18AS
SOX21	SRRM3	ANKZF1		TYSND1
RASSF1	BEND7	CLPB		KIAA0513
CELF3	LNX2	PBXIP1		RASAL3
WIF1	GPR97	SMAP1		LPIN1
FZD10	UNC5CL	FLJ13224		MFSD1
IRAK3	FAM217A	NXT2		SPHK1
NXPH4	NYAP1	MOV10		ELAVL2
HRH3	CCDC129	B4GALT3		FAM83F
TMC6	FGA	MON1B		ISL1
FKBP9	FGB	AGBL5		B3GNT4
MGLL	FGF1	NAA15		CLEC14A
NID2	FGF6	DSN1		SNX19
ITGA11	FGF7	C9orf95		KIAA1257
IKZF3	MAPK15	WDFY1		FAM53B
RHOBTB3	FGF13	NDRG3		KLHL30-AS1
PPM1E	FGG	CENPN		CES2
FRMPD1	FGL1	CEP135		FAM69B
VASH1	FGR	ACTR6		BRD3
SLITRK3	FHIT	CEP63		MT1X
ABLIM3	FHL2	KLHL18		C17orf28
ZNF365	FIGF	MTHFSD		KIAA0226L
RPH3A	TFEC	GINS3		PLEKHM1P
DENND3	MRAS	CWF19L1		FAM133B
HABP4	ATF5	ZNF324		TIRAP
DKK1	PUF60	NOL10		MAP2K3
AKR7A3	DLGAP4	ATG10		NR5A1
SORCS3	RAB11FIP2	SMARCB1		CDH23
LIMCH1	PPM1E	CEP85		TULP1
DAAM1	DOLK	NSUN7		SH3GL2
PDZRN3	R3HDM2	ORC6		FBXL6
PDZD2	MLXIP	C1RL		PGM5
MYCBP2	FKBP4	CARKD		MGC45922
ARHGAP26	FKBP5	COPS7B		OLIG1
MCF2L2	ALDOB	PRR5L		LYSMD2
SPG20	CARD8	SLC35E1		KCNK4
GLT25D2	ARSG	ABCA1		ROR2
TBC1D9	RUFY3	MUC16		TAF8
RFTN1	SBNO2	BRD9		ADAP2
PHLDB1	WDR47	ZNF385A		LRRC71
KANK1	KLRK1	PLEKHG2		ABCC9
TBC1D1	MMRN1	ZSWIM4		SLC6A1
PLCB1	MAPRE1	LTBP3		ARHGEF7
ASTN2	SCAP	RASAL3		GPR180
SMG6	AKR7A3	C17orf70		GPR137
ACSL6	FOXI1	SAMD4A		DPYS
DMXL2	FOXE3	TCF25		SERPINB8
SATB2	PALLD	TCTN1		C3orf18
SYNM	TMCC1	SPATA20		TCTE1
SYNE1	MYO16	KDSR		BAALC
KIAA0895	ZHX3	TRAF3IP2		KCNA3
PPP1R13B	SETX	MICAL1		MXI1
CRTC1	FOXS1	LARS		THRA
COMMD3	HECW1	MZT1		TMEM171
KCNH4	RRP1B	ESRP2		GRASP
KCNH3	PEG10	DHX33		CCDC71
GPR161	ZNF423	SPAG5		PAK6
OTP	FLII	ECHDC1		NID2
ANGPTL2	ZC3H3	FAM82A2		EGR2
ABCB9	MLANA	TUT1		GLT25D2
HEY1	STAB1	NMNAT1		C10orf67
ETHE1	METAP1	NDOR1		TNK1
CBX7	LARP4B	FBXO31		TNFRSF19
HEY2	PHLDB1	TXNDC15		CAMSAP3
MACF1	ACSBG1	PAQR6		PCDH1
DAAM2	SYT11	KLHL24		P4HA2
MAPK8IP2	MLC1	FUZ		FAM108A1
SEZ6L	KAZN	UBXN7		LPAR1
TSPAN15	SOGA2	MYO19		GIPC2
VSIG2	FMO1	TUBGCP4		SLC30A10
FAM215A	MCF2L	TSR1		SLC6A11
DAPK2	DNMBP	WDR96		NCAM2
PHLDA3	FMO2	DCAKD		MLLT3
NTSR2	FAM208A	RBM3		FAM201A
TMEFF2	FMO3	DYNLT1		CCNA1
SH3BP4	FMO4	WDR19		ACAN
FLRT2	ATMIN	VPS33A		NMUR1
IFIT5	FMOD	TRIM46		MFSD4
LAMP5	SUN1	RIC8A		D2HGDH
TMEM59L	PUM2	CDC73		SNAP91
VAX2	ARHGEF18	GLG1		COL25A1
ARIH1	NCSTN	ZNF33A		TEX2
BACE2	NCAPH	PPP1R12C		ST6GALNAC4
ABTB2	SIRT1	MICALL2		KLF15
PARM1	GRIP1	RNH1		ASPHD2
CHRDL2	TPSD1	FLJ23519		GPRASP2
OLFML2B	C3orf27	RPL10		CDH7
MYRIP	ATP1B4	NKIRAS2		C6orf141
CNRIP1	ANGPTL2	CCDC142		TFAP2B
CLIC4	FOLH1	TMEM25		PRKCH
GPR124	ABCA6	C1orf124		KIAA0182
MOXD1	PHF3	MBOAT2		NTSR2
CHD5	CAPN7	CBR4		SLC35F3
CNTNAP2	QPRT	ZNF521		MMD2
DCAF4	BRD4	DBNL		STK32B
PYGO1	FOLR1	RNF40		NFAM1
RIBC2	TNFRSF13B	SPCS1		DAAM1
NKX2-8	FOLR2	ZDHHC12		VMO1
FGF20	DAAM2	CALU		AEBP1
AK5	RIMBP2	ATG4B		C9orf100
GBGT1	KIAA0240	BSCL2		HOXD8
LHX6	NUP188	TBRG1		PCP2
PTPN18	ANP32D	RNF146		CDHR1
CNNM1	FOLR3	TESK2		EBF1
AATF	ANP32C	CYP2S1		MAP2
GREM1	KAT6B	BCAR1		HERC3
TBL2	ACAP2	BBS1		FAM162B
KCNV1	MMD	DTL		FLT1
FOXB1	PIK3R5	PNISR		CD34
ANKRD1	SLC16A8	PBLD		GRID1
D4S234E	SEC14L2	TMEM209		DNAI2
STAU2	LILRA4	RAB2B		JAK2
LAMP3	PSD4	PRMT5		PACSIN1
CACNG4	HYAL4	C12orf52		RASGRF1
DKK2	SNAPIN	MPDU1		BVES
CPNE7	CLDN14	SLC35C1		MMP17
GLS2	CHST5	CCDC47		NPHP4
OXGR1	LPAR3	CENPO		PCSK2
PCDH17	FPR2	HSD17B12		SNCAIP
BHLHE22	CASP14	PCGF6		TSLP
PCSK1N	CARHSP1	CYYR1		SLC22A23
SLCO4A1	FAM215A	RGS3		SIAE
DLL1	ZMYND8	CNBP		SNX32
REM1	SH3BP1	DET1		CGB
GIT1	TSSK2	SNAP47		EYA4
RGCC	ZIM2	TRAF2		KIFC3
STXBP6	NTSR2	LOC646471		UNC5C
PYCARD	CBLC	TMEM9		KIAA1045
TAGLN3	FAM89B	ATG4A		GRM3
TMOD2	SPO11	LOC100129447		VSTM4
CARD10	KCNE1L	FLJ30403		DOC2A
ST8SIA5	CA14	KIFC2		CDK5R2
PCDHB1	HSPBP1	CHN1		PABPC1L2B
TRHDE	LY96	SGK1		LEKR1
TBX21	PLD3	GLB1L		PAPLN
TLX3	TRIM29	C1orf131		TRAPPC5
SLC40A1	STX12	C10orf25		GLT1D1
RAX	SMPX	RBFOX2		PTCH1
VSX1	PRKD3	ZNF599		DNMT3A
KCNIP1	KCNE4	CENPT		OBSCN
NT5C	C15orf2	FLJ30679		MICB
CDR2L	PISD	UTP23		SEC31B
WRAP73	FLRT1	KLHL32		HLTF
G0S2	BRD1	C21orf59		CXCL16
DUOX2	ABCA4	C14orf126		FBXL21
COL5A3	ALOX5AP	DOCK7		NID1
PODXL2	CLDN15	RSPH9		FAM131B
CALY	ALOX12B	OSGEPL1		PKNOX2
NEUROG3	ANXA8L2	NSUN2		STK32C
KCNK4	FRK	ZNF573		KLHL17
IRX4	MS4A6E	PIGS		B4GALT1
DHH	DEFB123	CCND3		IFIH1
SHANK1	ATP6V0D2	FRMD6		SYT9
ZNF593	GAS2L2	ERN1		WT1
PLLP	STAC3	CENPL		JAKMIP1
RNFT1	LINC00315	ANTXR2		SLC9B2
CERCAM	SPESP1	ZNF547		SLC2A13
LEF1	IL27	XRCC6		DAAM2
IGF2-AS1	ALOX15B	PSMD3		SMOC2
PIGP	ALPI	C17orf108		IL7
NRN1	FSHB	PODXL		PTPRG
KCNK9	CENPI	ZC3HAV1		QPCT
AHSP	FSHR	KCTD18		SKAP1
PRR16	NR5A2	FASTKD1		SH3D21
C8orf55	ALPP	NPHP3		FAM78A
DACT1	ALPPL2	RAB1A		GNAL
WT1-AS	ADAM2	ATXN7L3		TBC1D1
ACTL6B	GAST	ZNF669		GALNT10
SCARA3	FUT1	EXD2		DDX25
HPCAL4	FUT3	HMGN1		KCNIP1
RHCG	FUT5	NAA35		GPX3
ETV7	FUT6	FNDC3A		MBNL1
RAB6B	FUT7	LRSAM1		TOB2P1
RASD1	FUT8	ATG4D		REEP4
TMEM66	HEPACAM2	C14orf101		CPEB1
TPPP3	PRR14L	EWSR1		HHAT
NLK	DARC	FAM126A		MLPH
POLR3K	FYB	PORCN		APOB
UPB1	C20orf166-AS1	UPRT		HPSE
ATP8A2	TTLL10	C21orf58		CCDC3
TUBA8	SLC37A4	TDRKH		EPAS1
SPA17	FAM26E	TMTC4		CD248
LRP1B	BPIFC	ATP13A1		SCN5A
SHC3	AKNAD1	VAC14		PTPDC1
CLIC5	PHYHD1	WDR67		PCDHGB7
S1PR5	C16orf73	PHF15		LSMD1
DSCR6	LYG2	LOC441204		RBMS1
FXYD7	C8orf46	KIAA1715		RAX
FXYD6	LCE5A	ATG9A		LRRC32
IL20RA	KRTAP15-1	TNFRSF1A		SCUBE3
FGFRL1	CALHM1	TARSL2		CDK6
A4GALT	TMEM86B	ZNF785		CD44
TSPEAR	CCDC108	ZKSCAN4		SLC2A4RG
RIPK4	PDZD9	ZNF420		C19orf46
GPR88	GABRA5	SNRNP48		LAG3
KCNK10	GABRA6	TMEM79		C16orf7
SNTG1	PAN3	BTN2A3P		PTPN18
WNT4	GABRD	HECTD3		IGF2
SIAE	EML3	TTC19		FAM134B
SEMA5B	LINC00521	IWS1		MYO1B
CRCT1	SCML4	TBL1Y		NXPH4
RBFOX1	GABRE	KCTD10		GNG7
SLC6A20	LYSMD2	TPM3		MTA2
SLC35F2	CXorf23	EHMT2		CPNE2
FEV	GABRG3	SAMD13		ZFYVE28
FAM20A	MAP7D2	COQ10A		LGALS3
ROPN1	GABRR1	ABCB6		E2F2
BTG4	C17orf66	TRMT2A		ANKRD18DP
TET2	ALX3	PM20D1		COL11A2
DCHS2	GABRR2	ITFG3		CPD
GIPC2	ZNF683	TMEM198B		HRH2
VPS13C	LINC00205	ZNF773		ITGA4
SIDT1	ARHGAP30	CCDC164		SLC27A2
ARHGEF38	GCET2	DNAAF1		ANKRD13A
PAQR5	DSCR9	FAM194B		SLC47A1
FAM46C	CCDC96	CCDC7		ARL10
BCOR	KLHL34	FLJ32790		GLS2
LPPR1	UTS2D	CCDC114		GABRE
RASIP1	SNX33	ASPSCR1		GRIN2C
PID1	TAB3	DZIP1L		SLC2A2
EPN3	C11orf41	C9orf3		C6orf97
FEZF2	GAGE4	ATP8B3		ZEB2
ARMC4	SLC24A2	AXDND1		C3orf39
TMEM38B	C22orf31	PLDN		C7orf31
APPL2	RASGRP3	MAST4		NOTUM
LGI2	CCDC19	RSPH3		SETBP1
SLC47A1	NGEF	TDH		PTCHD1
MCOLN3	CIZ1	ANKRD29		RGS19
FBXL8	AMBN	METTL6		ADAMTS18
GIMAP5	SPDEF	C20orf196		PTPN3
CHDH	POM121L1P	BUD13		CNNM4
HEMGN	KLK5	UCK1		PLEKHH2
LRRC59	MTO1	STK32C		GSTK1
CAMK2N1	TPSG1	SPSB3		P2RX6
H2AFY2	GALK1	IST1		SEPT11
BATF3	DCAF12	SCRN3		KCTD1
SMPD3	PART1	CDH24		ANXA4
ASIC4	ABHD14A	GSG1		KREMEN1
TRIM36	GALNT1	WDR92		VGF
KCNQ1DN	RCHY1	C16orf92		MAP6
GALNT10	AMBP	AKR1D1		CEBPA
LIMS2	AHCTF1	C11orf82		KDM4B
POLR3E	GALNT3	CEP19		BARX1
HHAT	POT1	MRPS5		FAM107B
SAYSD1	DSCR10	CCDC13		WNT9B
ADAP2	MRGPRX1	TRPC4AP		CPNE7
HR	TAS2R19	SLC17A9		PHF2
PAG1	TAS2R20	INO80E		VPS37D
LMO3	TAS2R50	FUK		TNFAIP3
GPRC5C	GAMT	ZNF449		WNT5A
MESP1	IL4I1	GLYCTK		CC2D1A
THSD1	ZNF385A	TBCK		IGFBP3
SULF2	PNKD	NUP43		MBP
SEPT3	PNISR	QRICH1		IL15RA
AJAP1	KANK2	ZNF621		CXorf40A
GNG12	NECAP1	GFOD2		MAN1A1
PCDHGC4	KRT23	MON1A		REEP5
PCDHAC2	ABP1	METTL13		ST3GAL5
PCDHAC1	TBC1D10B	TMED4		KANK3
PARD3	DAK	PRRT2		RGCC
SLC7A10	L3MBTL1	SCAMP4		CUX1
PRMT8	PCDHGA12	STT3B		PPP1R2
KCNQ5	IPCEF1	EHD4		C18orf1
CYP26B1	SIPA1L1	GBGT1		C5orf25
EIF5A2	SETBP1	ACAD8		DPY19L2P1
KCNK13	FDCSP	PRKAG2		HIP1R
KCNK12	GPSM1	ZNF485		ECEL1P2
BARHL1	DCAF4	USE1		ARHGEF1
DPYSL5	LRIT1	FADS1		OLFML2B
NDUFA4L2	PYGO1	POLR2M		ZMYND15
MEIS3	TTLL3	LOC388152		ARID5A
C14orf162	C10orf12	TSEN2		MSX1
ARNTL2	LRRC32	MASTL		FAM129B
LHX9	GIMAP2	MTL5		GRHL1
SHD	GTPBP5	SLC2A6		CCDC149
C14orf132	PCDHB5	CD276		CCDC74B
ADAMTS9	INTS1	FRMD8		MSC
CXCR7	OR1A2	FAM98A		CDKN1C
SLC17A7	PTPN22	HSDL1		CPAMD8
TBX20	GAS2	GRAMD1A		SMARCA2
SLC17A6	GMEB2	ZGPAT		MFSD12
PLXDC1	GAS6	ABHD12		UGT3A1
RNPEPL1	OR2F1	STK40		NECAB1
PAK7	STAP1	SHKBP1		FOXO3
KIAA1191	GATA1	CCNDBP1		DPY19L2P2
ADAMTSL3	TIAM2	DIRC2		KCNA6
MCOLN1	LCE2B	UXS1		DLX6
ATP10A	KCNG2	LOC100132356		BARX2
GPR126	CLEC4E	STK3		CYP26B1
KIAA1199	OPTC	TMEM234		HTR1E
CBX8	SLC13A4	THOC6		PTPRN
ZNF287	FBXO4	MRPS35		ZNF365
TTYH1	VPS33B	TTC13		FAM208A
GJD2	SACS	CHID1		KIAA1161
RHOJ	PLA2G2D	C9orf7		ENDOD1
ABHD6	GATM	UBAC2		PRDM8
SLC24A3	CLDN17	FAM73B		FARP1
NDRG2	FGF21	COQ9		KIT
DSCAML1	EHF	FBLN1		MYT1L
SLC12A5	GBP1	SPP1		RARA
STAMBPL1	GAPDHS	SLC2A11		LOXL3
PREX1	OR7A17	PGAP3		OXCT2
BEGAIN	GBP3	SV2A		ACSF3
KIAA1456	GC	NDFIP1		PI4KAP1
ISLR2	GCG	TOR2A		PPM1J
KLHL1	GCK	CCDC107		C8orf31
CACHD1	GCKR	VWDE		C8orf82
CPNE5	PTPN18	TMED3		LMO2
SPTBN4	NUPR1	LAMC3		OPCML
SCUBE2	OR10J1	BACE2		DRD1
FAM5B	OR8B8	GLT25D1		MGAT3
HES4	PLEK2	SSR1		GSX2
GRHL3	AMELX	KIAA0090		EPN3
SLC46A2	CNNM1	FAM174B		SEMA5B
NGB	GCNT2	IGSF8		LMOD1
CXCL16	FXC1	GGT7		LOC440461
RHOU	EIF2C1	ZMIZ2		PLEKHG4
OVOL2	IL36RN	RHOT2		GPR132
ZNF250	TSPAN16	CRTC3		ZNF703
ARHGAP22	OR12D2	ASMTL		FEZ2
DMRT3	OR10H2	CLCC1		MAP7D2
RRAGD	OR10H1	FRMD5		DGKG
HIVEP3	ITGB1BP2	SKA3		FOXD4
C21orf63	SRPK3	ATG16L2		RILPL1
MESDC1	GDF2	WDR62		TEAD3
NTN4	MSTN	NFASC		SORBS3
CACNG6	VCX	ZFAND4		ZNF385B
PRDM12	GDF9	HMG20B		PRR16
ALOXE3	OFCC1	GRSF1		SPDYA
SLC5A7	OR7C2	EFCAB2		ZNF512
HPSE2	OR7A5	ITM2C		TCERG1L
ALX4	OR7C1	CLDN9		KRT8P41
PROK2	BEST4	WDR90		BCL2L10
CELF6	RGL4	TJP3		PKDCC
BCORL1	OR2W1	ARHGAP12		SMYD2
BCAN	GFAP	ZNF551		HIC2
CHP2	PGBD3	ZNF780A		GSTM2
FAM217B	OR2H1	ARHGEF19		C14orf37
NEUROG2	GGT1	SNX33		LOC100131366
PRDM16	B4GALT1	POLR1E		DIO3
CLSTN2	GGT5	ZFAND2B		C14orf80
SMOC2	GH1	KHDRBS1		FBLN5
GFRA4	GH2	MTX3		SSTR1
LRRC4	AMHR2	PPP2R1A		NFIX
XYLT1	GHRH	FAM171B		LIN54
ABCG4	GIF	POU2F1		EPHA5
LHX5	GIP	PDZD4		ANKRD33
PDLIM2	SMR3A	RNF2		TET2
SOX17	PABPC1	CLVS1		RAB15
HHIP	FETUB	POLK		WIPF1
CDH22	CYFIP2	ZNF511		MECOM
CSMD1	AMPD1	METAP2		LAD1
PARP12	GJA3	PGRMC2		ZFP3
ISL2	TCL6	NCL		DDAH1
CDCP1	GJA4	SREK1		SLC8A1
NDRG4	NGFRAP1	CRTAP		ATP2C2
SLC26A10	ZBTB32	NFKBIZ		RASGEF1B
REEP1	SIGLEC7	CAPS2		ACTA1
WNK4	LAT	RBBP7		PIK3AP1
ZSCAN18	GJB1	AIF1L		TSHZ3
DLK2	DAPP1	PTGR1		C22orf15
BOLL	LAMP3	STK11IP		GSTT2
DUSP26	B9D1	RPUSD3		H1F0
TMEM106C	CACNG5	C8orf58		MAPK12
AHNAK	KCNMB3	PRPF38A		ABHD6
KCTD15	SND1-IT1	ZXDC		CUEDC2
MLPH	SDCBP2	ZNF563		DOK1
ZNF343	PDE7B	NDUFS7		IGFBP1
IRX3	GK2	ME3		NPDC1
BHLHE41	DKK3	LOC100128501		FAM89A
ULBP3	CYTH4	C15orf57		HLA-C
FAM65A	KCNH5	KLHL25		CD99
TTC13	TJP3	ACSS2		CRIP2
GALNT14	MORC1	RABEP2		TIMP3
NDNF	CIDEB	MGC21881		HTRA3
EFCAB1	FILIP1	ACAD10		MAPRE3
DHX40	CHIA	FOXP1		PGF
STEAP4	INGX	ABCF3		PROC
C17orf101	SIGLEC9	FECH		PPP1R1B
TTLL7	IL17B	MAGED2		SLC22A17
CLIP4	GPR82	SRSF2		ELAVL3
C1orf115	HCAR1	TFPI2		MCART1
LONRF3	AMPD3	GYLTL1B		HLA-B
C11orf63	GPR77	ENDOV		PTPLAD2
BAALC	SULT1C4	LOC100128979		P2RX4
ACTR5	ARHGEF16	NUDT16L1		SERP2
CNTD2	GPKOW	STEAP2		RASSF7
SYNDIG1	SIT1	C1orf55		KHK
DNAJC22	RNF115	FKBP10		GMPPA
SCD5	CNTN6	RG9MTD3		SIRT2
WDR76	LSM3	SPATA13		DTNB
WLS	TINAG	CLINT1		MAP3K8
ANKRD53	SULT1B1	LOC100129406		IER5L
GPR157	TEKT2	PDDC1		CAMK2B
ZNF703	SRPX2	MDP1		LRRC38
PQLC1	RBMXL2	EXOC3L1		HCP5
ZC3H12A	SPINK4	HEATR7A		UPB1
CWH43	DHDH	PRKD2		STARD8
MOGAT2	TP53TG5	MBD6		SLC7A6
SPSB1	ADAMDEC1	TTC29		CA10
CCDC92	AMPH	ZNF555		LRBA
ACSF2	BMP10	OSBP2		RASA1
PIGZ	HPGDS	LRRC27		PPP2R4
SCUBE1	ANGPTL3	C15orf38		SEL1L3
EFHD1	RPS6KA6	CCDC71L		MPP2
SPHKAP	P2RY10	ZSCAN29		ZFHX3
SP6	RABGEF1	ATF7IP2		TSPAN7
WNT10A	TOR1B	FLJ36116		PYY
ULBP2	GLI2	SEC14L4		RUNX1
ULBP1	TOR2A	RPL32P3		PRKG1
RNF39	CECR5	RNF38		PTPRR
ESX1	GML	FLJ39653		IRF4
NDFIP1	GNA15	TMEM63B		NR4A3
THAP7	GNAL	APOBEC3G		CD38
ZNF436	GNAS	AP4B1		MAP3K5
PRRT1	GNAT1	ANKRD11		MYO18A
COLEC12	GNAT2	SEPHS2		GLDC
GPR63	GNB3	ACAP3		MET
FAM49A	GNG7	SCAI		EGFR
TMEM163	AMY2A	RFNG		CALCR
KAZALD1	GNG10	TACO1		POLE
AMN	GNGT2	PELI3		FAM155A
PPP1R14C	GNRH1	RMND5B		CACNA1E
SLCO5A1	GNRH2	MARC1		CHRNA4
NETO2	GNRHR	CAPN5		SNCA
NETO1	GNS	FLJ36848		ITPR1
SFXN3	ABO	ASCC1		ADRB2
PITPNM3	AMY2B	TRAPPC12		THRB
ELOVL3	SSX6	MAP3K12		TAL1
SCRT1	SSX7	UBXN11		PRTN3
GPR101	SSX8	DIS3L2		FUT4
RASSF5	WFDC10B	MINOS1		NFKB1
SOX7	SFN	LOC100130557		NPR3
CCDC3	GP1BA	FLJ37035		LHCGR
TEKT1	GP2	LOC439914		CALCA
ESPN	GP9	DTX3		PPP2R2B
CRISPLD2	GPD1	RSRC2		IL12A
TFAP2D	GPD2	RNF121		CACNA1D
ESYT3	GPLD1	DNAH7		TMSB10
SLC4A11	SLCO4A1	LOC100128398		CACNA1B
B3GNT5	GPR1	FLJ37453		ACVRL1
EMILIN2	IL29	PGBD4		ADA
DTNBP1	XCR1	OGFOD2		ADRB3
PLEKHN1	C10orf125	C9orf47		FAS
QRFPR	JAKMIP3	LOC645431		COL1A1
PPP1R1B	H19	NMT2		COL5A1
SGK196	CDH20	IFI16		COL7A1
ZNF541	C11orf44	UBA6		CST3
TMEM117	LINC00301	DNAH11		CYP1B1
ZMYND15	NPBWR2	SPAG16		EMD
PSD2	CCDC88B	DYX1C1		EXT1
SYT3	OLFML1	SLC39A11		F13A1
TCHP	CXCR3	SAP30BP		FBN1
DYDC2	OTOGL	LCLAT1		FGFR3
PCGF5	CD163L1	CCDC88B		GCH1
PRAC	SLC39A5	SFXN4		GHR
C15orf48	GPR133	PLEKHG6		GIPR
RAB11FIP4	CLEC9A	DIS3L		GLRA1
PHYHIPL	C12orf36	CNEP1R1		NR3C1
MEGF11	MYO1H	FAM82A1		GSN
JPH4	C12orf51	GSPT1		GUCY2D
NKX6-2	C12orf40	HMGCS1		TBX5
ACSS1	LINC00346	PCDHB18		SHH
MCHR2	CHAMP1	INO80C		HSD11B2
NT5C1A	GPR12	ALKBH8		ICAM1
ST6GAL2	KCNRG	ZNF557		IDUA
NTNG2	C14orf178	LOC100129858		PDX1
SLITRK2	C14orf177	SPNS1		ITGB2
KISS1R	SLC25A47	PSMG4		ITGB3
INSM2	TSSK4	PRELID2		ITGB4
LOXL3	HMGN2P46	LOC338799		KCNA1
AGPAT9	SLC24A5	PEA15		KCNQ1
ZNF503	GPR15	CD109		MAOA
RSPO3	FBXL22	FLJ38576		MYO5A
MFSD2A	CCDC79	RNF185		PAX2
C1orf198	LINC00304	FLJ38668		PAX6
ATOH8	C16orf79	RPAIN		PGAM2
FIBCD1	C16orf54	RBMX		PKD2
LOC84931	GPR17	FLJ38717		PKP1
C13orf33	CCDC57	LOC646976		PMP22
CORO6	KANSL1	C19orf66		POU3F4
KIAA1984	TTLL6	TP53I11		PITX2
AJUBA	GPR18	MEX3C		SCNN1B
IGSF21	GPR19	UPF2		SOX9
TOX2	KCTD1	LOC100131150		SPTB
COL27A1	ZNF776	HYI		ABCC8
NKD1	CXCL17	SUSD4		TGFBI
NKD2	C19orf63	RAPH1		TNNI3
DISP2	KLK9	THSD1		TTPA
TSLP	C19orf75	RTTN		AIRE
PSKH2	ACTL9	LIPA		CASR
SCRT2	GPR21	HDGF		GP1BB
WNT3A	ZFP82	ZNF673		LOR
NAV1	VSTM1	PUM1		OXCT1
NAV2	ODF3L2	TCEANC2		PCSK1
KCNK17	THEM5	ARFIP1		SLC26A4
C3orf15	GPR22	DDX26B		PLEC
LHX4	OR2L13	COG4		SHOX
KCNH7	SLC9A11	ZNF347		HNF1B
EMILIN3	NBPF15	LONP1		TWIST1
UNC5A	LPAR4	ANKLE1		NR0B1
EXOC3L2	C1orf111	TOLLIP		CFTR
SHF	MCHR1	NACA		FBP1
DUOXA1	SLC25A34	HSPBAP1		GDNF
ESAM	C20orf197	SCFD2		HBA2
SCARF2	GPR25	KCTD15		HOXA13
UAP1L1	LOC284837	MRPL28		HOXD13
SLFN11	SEC14L4	LOC646999		HTR1A
BOC	LOC284912	TSPYL1		KCNJ11
SYT12	SH2D6	EXTL2		HBA1
ZNF804A	CCDC141	ADCK1		IL6R
CHMP7	C2orf61	WIBG		IGFBP2
TMEM88	FLJ38379	MBLAC2		IGFBP5
CDHR1	DNAJC5G	FLJ39639		NOS1
RCSD1	FLJ33534	DERL3		BDKRB2
SCGB3A1	CYP1B1-AS1	CHCHD5		BCL2
SPSB4	UNC80	L3MBTL2		RFX2
OTOP2	FBXW12	LOC100131860		VTN
CAMK2N2	HTR3E	CARD11		TGFB1
SYTL4	GPR31	LOC100133991		ADORA2B
FOXQ1	IGSF10	NAA16		ADRA1B
GNG8	SUMF1	LAS1L		ADRA2A
EPSTI1	TPRG1	RAB11FIP4		ADRA2B
PTH2	GPR32	TRIM14		ADRA2C
KIF12	SLC36A3	WDR93		ADRB1
TMEM54	OR2V2	ARRB2		ALDH1B1
PIK3IP1	GPR34	ADGB		ALOX12
TRIM9	CEP57L1	MFSD5		ALOX5
CYGB	FLJ34503	PRKAG1		ATP1A1
CSMD3	LY86-AS1	NAE1		AVPR1A
SLITRK1	PRR18	KLHDC3		AVPR1B
SORCS1	GPR35	EP400NL		BLVRB
OSBPL5	ANK1	C3orf71		TSPO
C1QTNF1	C7orf53	CAGE1		CA4
C1QTNF2	FLJ40288	FLJ40606		CACNB3
C1QTNF5	FAM83H	CKAP2L		CACNB4
FBXO32	C9orf79	C8orf83		CALCB
MARCH3	LCN12	PERP		CCK
KCTD12	C9orf142	MYD88		CHRNB1
RAB3C	GPR39	C19orf29-AS1		CHRNB2
FOXP4	FAM78A	PLD5		CHRND
LRRC3B	FFAR1	ZNF283		CRAT
PHACTR3	FFAR3	TRA2B		CRH
RBP7	MAGEB18	NOA1		CSF1
GRIN3A	GPR42	CLCNKB		CYP26A1
FAM129A	FFAR2	CASC4		CYP27A1
RAB3IP	STON1-GTF2A1L	CHCHD7		DRD4
SLC16A10	ANK2	FAM76A		DRD5
GPR62	TRIM42	ATP6V0E2		EPO
FOXN4	MKNK2	UBQLN4		GABRA4
KLHDC1	GPS1	PAF1		GABRB1
SLC24A4	GPS2	OSCP1		GABRB2
DEGS2	GPT	PNP		GAD1
SPATA2L	GPX2	PRPF31		GAD2
NOXO1	ANK3	SLC39A13		GAS6
MSI2	GPX5	LOC100131530		GRIK1
TMEM132E	GRB10	ANKDD1A		GRM1
B4GALNT2	RAPGEF1	WDR17		GRM2
ANKLE1	IGKV7-3	GHITM		GRM6
PODN	TRIB2	ADAM32		GRM7
C1orf87	CCDC22	PPARD		GSTM3
LIX1L	REM1	EFHB		GSTM4
PROKR2	GRIK2	A2ML1		HPGD
FBLN7	HIPK2	ZMAT3		HTR1B
BBS5	ANPEP	RNF217		HTR4
SGPP2	SLC43A3	ZNF605		KCNJ5
OSR1	CCDC113	RPS6KC1		MAOB
CPNE4	SETD2	ZNF546		NPY
TMEM155	NR3C1	CRB2		NPR1
SPATA18	CHMP4A	NEK10		NPY1R
OTOP1	THYN1	NAT9		NPY2R
SLC9B2	ARHGAP35	FAM173A		OXTR
EGFLAM	DNAJC15	ZNF580		POMC
WDR36	PYCARD	CXorf48		PTGDR
SOWAHA	GRM1	EGLN3		PTGER1
SHROOM1	C6orf15	PRPF40B		PTGER2
B3GAT2	BRD7	AP1G2		PTGER4
C6orf141	GRM2	ANKS3		PTGS1
KLF14	CLEC2D	C1orf35		RPL38
CHODL	PRSS50	DGKZ		ATP2B4
GATA5	UHRF1	TJAP1		SNCB
SLC32A1	GRM4	SAAL1		C9orf103
CBLN4	GRM5	C1orf96		GRB10
SAMD10	GRM8	ZNF292		GDF6
RIMS4	GSTA3	CENPM		CYP27C1
ANKRD60	GSTM5	SDR39U1		IL17REL
NEURL2	GSTP1	TAS2R14		C9orf170
NANP	GTF2H3	BBS12		LCN10
DYDC1	GUCY1B2	FAM83G		ATP1B1
SYT9	BLNK	NUDT8		C10orf55
PRICKLE1	TMOD4	TMEM241		LHX8
AMDHD1	TMOD3	LOC729860		EPSTI1
ZNF664	GUCA1A	LOC645769		GPR139
FBXL14	PARVB	MYL5		KCTD11
FAM109A	GUCA1B	LOC253039		FAM150B
LACC1	GUCA2A	CLN6		TPD52L1
GSC	ZDHHC1	IL10RB		KLHL31
PRIMA1	VPREB3	MBTD1		MGLL
ABHD12B	REPIN1	RAD9B		SMARCD3
ISM2	GUCA2B	CCDC83		SP5
LRFN5	GUCY1A3	SLMAP		PARP3
GCOM1	GUCY2C	LOC100132272		HBM
CMTM2	TFPT	FLJ42289		GRK4
FBXL16	TRPM5	ASGR1		AKAP2
TMC8	ICOS	TOM1L2		ZCCHC16
CBLN2	UBN1	LOC100131000		FIGLA
ANKRD29	GUCY2F	LOC100129995		PAPL
APCDD1	STRN4	MCF2L2		FLJ16124
CILP2	RBM15B	LOC644841		NRARP
SYT6	MYLPF	CCDC62		DPP10
SAMD11	GPSM2	PMF1		METRNL
SLC35F3	GPR171	FAM122B		FAM19A3
FAM163A	GYPA	SHISA5		ANKRD34B
MFSD4	GPR132	PHLPP2		ST8SIA6
C1orf213	GYPB	NYAP1		SFMBT1
CNIH3	PKN3	MAPK10		TMEM198
MANEAL	PADI1	LOC100129936		CHD3
AIFM3	PNMA3	NAPB		FLJ46347
SEPT10	OSGIN1	LOC100131654		RGS10
CCDC140	IL19	TNKS1BP1		AK4
FAM84A	PDZRN4	FAM47E		ZNF32
GDF7	GYPE	LOC100130451		YPEL2
SLC16A14	STRN3	PNPLA7		PLCXD3
FAM19A4	A1CF	GEMIN8		ATP8B2
GLIPR2	GYS2	CAPZB		CHRM2
CMTM8	RHOD	ZNHIT1		EPHA8
CNTN4	OBP2B	LEPREL1		SDC1
IRX2	GZMH	SBNO2		C20orf201
LOC153684	PILRA	NCAPD2		NTRK3
RAET1L	BAZ2B	LOC646034		IGSF3
RUNDC3B	GLTSCR1	CUL9		PLA2R1
TMEM65	GUCY2D	BANP		RASL10A
NKX6-3	GZMA	ALPK2		SHISA2
C9orf66	SH3KBP1	LOC100132244		LINC00523
RASEF	GZMM	LOC344967		IGFBPL1
PRUNE2	ANXA1	DENND5B		C1QL4
SLC35G1	HIST1H1T	FIGN		CTDSPL
GRASP	HIST1H2BB	DDHD1		TTLL9
TMEM229B	HABP2	SETX		MXRA7
CLEC14A	HAL	FAIM		KIAA2022
ZFPM1	HAS1	NSUN5		CXCR4
NAGS	HBB	TBC1D22A		LPHN1
PHOSPHO1	HBD	KIAA0664		CCDC147
SLC16A11	HBE1	GPATCH4		SLC35D3
FBXO39	HBG1	LOC154822		DSP
TDRD5	HBG2	SLC6A10P		CLSTN1
KANK4	HBQ1	UBN2		KIAA0930
FAM43B	HBZ	FAM63A		PHF19
APCDD1L	SERPIND1	ZNRD1-AS1		RIPPLY2
LRRN4	HCFC1	THADA		SSBP4
CABP7	HCLS1	ATP8A2		SHE
CHST13	HCRTR1	FER1L5		PM20D2
CDC20B	HCRTR2	LOC100131094		TTC7B
NIM1	HDC	AKNA		SLC6A17
OLIG3	ANXA4	LOC729696		C1QL3
C6orf118	NCKAP1L	PRSS16		C10orf114
BMPER	CFH	ATG2A		GOLGA7B
ZNF800	PLA2G2E	MOCS2		FAM26F
SNX31	ERVW-1	PFKM		XKR7
ZCCHC12	KCNIP1	PLEKHB2		SOGA3
ARX	HGFAC	CXorf22		NTRK1
SSBP4	CD209	RASSF6		ROPN1B
ADAMTS15	DNTTIP2	TC2N		SOHLH1
ADAMTS17	CTAG2	CCT3		ANKRD20A3
ADAMTS18	HIVEP2	MRPL30		FOXP4
GSX2	HK1	FAM160B2		GRP
PAOX	HK2	TSPAN4		CTBP1
ADCY4	HK3	CYP4V2		C9orf106
GGN	HLA-DOB	CCDC132		LRRC73
CADM4	HLA-DPA1	C18orf54		PABPC1L2A
TMEM61	HLA-DPB1	TM9SF4		C16orf86
TCTEX1D1	HLA-DQA2	ST5		FAM53A
CREG2	HLA-DQB1	LOC645676		NHSL2
ZNF584	ANXA13	LOC100129721		C12orf68
SLC10A4	HLA-DQB2	SNX22		LRRC26
KHDRBS2	HLA-DRA	FLJ44715		LOC400707
HTRA4	AOAH	LOC619207		C5orf56
LGI3	AOC2	ANK3		LOC441177
FAM123C	HMGCL	WHAMM		FOXB2
FAM123A	HMGCS2	ZNF618		C5orf39
GSX1	NR4A1	RIMS2		LHX9
ZNF804B	HNF4A	MKL2		CA7
ARMC3	HNF4G	TMPPE		FBXO44
UNC5B	HNMT	RUFY2		CRMP1
C11orf45	VN1R2	DNM1		SLC27A6
ATOH7	BPIFA4P	HNRNPUL1		LGR6
OAF	POTED	ZBTB47		VDR
RNF152	TAAR6	CSPP1		FAM78B
RASGEF1A	KRT73	PSTK		SCN1B
SPATS1	APBA2	C17orf56		SLC6A2
RBM24	HP	FLYWCH1		SLC6A3
SP8	HPD	GSTM5		SLC6A4
GPC2	APCS	TMTC1		SSTR2
VSTM2A	HPR	PHF17		SSTR3
RFX6	HPRT1	SFRP1		TACR1
SCUBE3	HPS1	ERI2		ALDH5A1
TMEM130	AIRE	LOC100130581		ABCA3
FERD3L	HPX	ADI1		ABR
VGLL2	ERAS	ZZEF1		ASIC2
ATP6V1C2	HRH1	ANKRD50		ASIC1
FNDC5	HRC	MACF1		ACTN1
EBF3	HRG	LETMD1		ACTN2
LCORL	HRH2	WDR44		ADCY8
PCSK9	HSD3B1	HMGCLL1		ADCY9
PTF1A	HSD3B2	TRIM24		ADCYAP1
CCDC110	HSD11B1	SSPO		ADCYAP1R1
TMEM151A	HSD17B1	C1orf138		ADM
LYSMD2	HSD17B3	NDUFA11		AGRP
CCDC96	HSD17B2	LOC100131089		ALOX15
NALCN	HSPA2	TECPR2		ANXA5
CYP4X1	HSPA6	DKFZP434A062		APBA1
PYDC1	HSPB2	LOC643936		NKX3-2
HS6ST3	HSP90AA2	ZNF662		HCN2
NPAS4	APLP1	LOC100132501		BIK
STK32C	DNAJB1	FLJ45950		BMP1
MKX	HSPG2	ARID2		BMP2
P4HA3	NDST1	WDR69		BMP3
KLHL35	HTN1	LOC100129195		BMP4
B4GALNT3	HTN3	CROT		BMPR1B
FBXL19-AS1	APOA1	DDX3X		KLF9
VMO1	HTR1D	TBC1D10A		CA9
SLC13A5	HTR1F	FLJ25694		CAV2
ZADH2	HTR2A	LOC339240		CBR3
FAM19A3	APOA2	DECR2		TNFRSF8
RUSC1-AS1	HTR5A	YOD1		ENTPD2
RSPO1	APOA4	TMEM136		CD70
EPHA10	HYAL1	ZNF532		CDH13
UNC80	IAPP	MMS22L		CDKN2C
ARL10	KRTAP8-1	TAF1D		CDX2
GPR150	KRTAP11-1	SLC35F2		CHAD
PRR18	KRTAP19-1	C1QTNF6		CHGA
FAM78A	KRTAP13-3	SNX1		CIDEA
ZAR1	KRTAP6-2	ANKRD20A19P		CST6
RAB37	KRTAP19-2	SMCR7		CTNND2
ANKRD42	KRTAP19-3	SLC4A8		CTSL2
FAM19A2	KRTAP19-5	ZIK1		CTSZ
VSX2	KRTAP19-6	ZNF615		DGKQ
CLEC4G	KRTAP20-1	CD160		DBP
FAM5C	KRTAP20-2	NEIL1		DDT
TFAP2E	KRTAP21-1	PRSS45		DYNC1H1
RSPO2	KRTAP21-2	C16orf59		DSCAM
CYP26C1	KRTAP22-1	C17orf107		EFNA2
VWA2	NLRP10	PLSCR4		EFNB3
SYT10	NLRP14	CYBRD1		CELSR2
SMTNL2	CLEC4D	UCKL1-AS1		EN1
STAC2	TAS2R60	TXNRD1		EN2
NCCRP1	ICAM2	ZBTB41		FAAH
BARHL2	SNORD108	LOC284837		FHL1
PAQR9	SNORD109A	ZSCAN2		FHL2
LRRTM1	HCAR2	ZNF720		FOXF1
OTOP3	KCNK18	EML3		FOXF2
AMIGO2	KRT79	ZSCAN30		FOXC1
FAM70B	C1QTNF9	ZNF788		FOXJ1
CCDC37	APOBEC1	LOC100129940		FRZB
NMNAT3	CPLX4	ATF2		FZD2
RTN4RL2	ADAMTSL5	CYB561D1		GALR1
ZACN	CLEC4G	TCTN3		GATM
NDUFS7	RXFP4	TOMM34		GBAS
GALNTL4	ZNF678	LOC729275		GBX2
C18orf34	PRSS38	METTL21D		GCKR
FAM89A	C2orf53	POLR3H		GDF1
VWC2	LINC00299	LOC100131831		GCLC
NAT16	C3orf35	SUPT4H1		MLNR
SLC26A5	GADL1	TPM1		GPR39
ILDR2	TMPRSS11A	ILDR1		CXCL1
TMEM179	TRIML1	CANX		HCRT
C16orf87	TMEM173	ANXA6		IGFBP7
RPRML	TREML1	BLOC1S3		CYR61
C17orf82	ABCB5	C5orf44		IL10RA
RGS9BP	VSIG1	STOML2		ACADL
RNF207	LHFPL1	LDHA		AHNAK
C8orf86	CXorf67	HSPBP1		AIM1
FAM150A	MS4A10	OS9		AMPH
FLJ45983	H1FNT	NFKBIE		AQP5
FOXI2	COX8C	C7orf49		AREG
SERTM1	GLDN	CC2D1B		ARF5
DEFB132	IDUA	IZUMO2		ARVCF
SAMD12	NACA2	PDPK1		ATP1B2
TMEM215	KRT27	CARS		BAI1
MGC39545	CFI	ZNF620		BAI3
DUOXA2	FLJ43826	ZDHHC8		BCL7B
MXRA7	IFI27	SLTM		BHMT
PALM2-AKAP2	AQP8	KIAA1841		BNC1
C16orf52	IFI35	MBOAT1		BMP6
LINC00173	RD3	LOC100133315		BTC
	SP110	SYT8		KLF5
	IFIT2	ZNF195		CALB2
	TGM6	RAD51		CAMK4
	IFNA1	RNF111		CAPN2
	APOC2	C1orf198		CCND2
	IFNA2	CCDC81		CD1D
	IFNA4	ZKSCAN2		CD8A
	IFNA5	ADAMTS17		CD72
	IFNA6	CDIPT		CDH2
	GPR148	NEK3		CDH4
	IFNA10	ZFP2		CDH8
	SAMD7	ZNF574		CDH11
	IFNA13	PRR3		CDKN2D
	AADACL2	ZNF624		CDO1
	IFNA14	WIZ		CDX1
	IFNA16	ZSCAN20		CKB
	OSTN	ZNF841		COL2A1
	APOC3	AEBP2		COL4A1
	IFNA17	C6orf170		COL4A2
	IFNA21	YTHDC2		COL9A2
	SLC10A6	DZANK1		COL15A1
	HSD17B13	TRMT1L		COL19A1
	IFNB1	ZNF346		CRABP2
	IFNG	CDK16		CRHBP
	APOC4	KCNT2		CRHR2
	IFNGR2	DPP9		CSNK1D
	EYS	SERPINH1		CFD
	SEPT14	CREB3L2		MPP3
	ERVFC1-1	AATK		DPP4
	STRA8	MAP2K4		DSC3
	KLRG2	ZNF607		HBEGF
	APOD	ARHGEF5		DUSP6
	QRFP	TENC1		DUSP7
	ITIH6	TMEM41A		TYMP
	IFRD1	PPP1R21		EDNRA
	SNORD64	SLC25A29		EEF1A2
	TUBB8	SCNN1A		EFNA5
	CATSPER3	OSTalpha		EGR1
	TBX10	ASB3		EGR4
	IGF1	NDUFS2		EVX1
	APOE	SETMAR		F2R
	ANKDD1A	CDK5RAP1		ACSL1
	IGF2	CCNC		FBN2
	IGFALS	FKBP5		FGF4
	C22orf34	RANBP3		FGF9
	C2orf48	PLIN3		FLT4
	APOH	SNRPC		GJA4
	IGHG1	BST2		GLP1R
	GPR142	ACSM3		GNAZ
	LCE1E	PSMD11		GPC1
	LCE2C	GPR89A		CXCL2
	LCE2D	CKMT1A		HLF
	KAAG1	AP2A2		HOXA4
	ZNF445	RPS6KA4		HOXB1
	KRT26	REEP2		HOXB2
	RGSL1	PIGC		HOXB5
	SPATA12	TIPRL		HOXD10
	GPR141	N4BP2L1		HSPA6
	POLN	NGDN		TNC
	IGL@	VAMP2		IGFBP6
	BMP8A	C22orf24		IHH
	LILRA5	NECAP1		IL13
	KLK3	CCDC9		INHA
	IGLL1	MRPS18B		INHBB
	IL1A	SRP9		INSM1
	IL1RN	NEK1		ITGA3
	IL2	C14orf109		ITPKA
	IL2RA	OTUB1		ITPR3
	IL2RB	GNA11		JAG2
	IL2RG	SCYL3		JUN
	IL3	EIF4A2		JUNB
	IL5	ULK3		KCNA4
	IL5RA	PDHB		KCNA5
	IL8	EFHC1		KCNF1
	CXCR1	GPR89B		KCNH1
	IL9	SMAP2		KCNJ3
	CXCR2	RUNDC3A		KCNJ6
	AQP1	EIF2AK1		KCNJ10
	IL10	C11orf54		KCNK3
	IL10RA	ZMYM2		KCNN1
	AQP2	FAM172A		KCNN3
	IL11RA	COQ7		KCNS3
	IL13	ELP4		AFF3
	BPIFB3	TMEM39B		LAMB1
	DPPA3	SPIN1		LBR
	AQP3	FAHD1		LIF
	TMPRSS9	TRAPPC8		LMO1
	PRSS41	LOC81691		LMX1B
	IL16	IQCE		LOX
	TNFRSF9	MCM10		LRCH4
	IL17A	KIAA1432		LRP3
	AQP4	SECISBP2		LRP4
	IMPG1	PHTF2		LRPAP1
	IDO1	IQCG		LTB
	INHBA	FIP1L1		LTBR
	INHBC	CLPX		LTF
	CXCL10	OTUD5		LTK
	INS	BAG3		LY6H
	INPP4A	STARD5		LY75
	INPP5D	TMEM55B		MAFG
	INSL3	DNAJC27		MAL
	INSL4	ZCCHC8		MATK
	INSR	GLUL		MATN3
	AQP9	TFE3		MC1R
	IRF5	GPBP1		MCC
	ISG20	NAP1L1		ADAM11
	ISLR	SNX13		MEF2C
	ITGA2B	TMEM48		MEIS1
	ITGAD	C12orf73		MEIS2
	ITGAE	RPL23AP82		MN1
	ITGAL	BRPF1		MPP1
	ITGAM	WAC		MSI1
	ITGAX	MYO15A		MAP3K10
	ITGB6	RBM15B		MSX2
	ITGB7	OVOS2		MX1
	ITIH1	PCCB		MYF6
	ITIH2	BCL2L13		MYL5
	ITIH3	ZNF75D		MYOD1
	ACADVL	ZCCHC6		NEUROD1
	ITIH4	NUP160		NGF
	ITK	ESCO1		NGFR
	ITPR2	ZNF540		NKX2-2
	IVL	MAP7D3		NOV
	JAK3	CAP2		NPAS1
	KCNA1	LOC147727		NPAS2
	DND1	MYCBPAP		NPTX1
	KCNA10	KIAA0020		NPTX2
	TBC1D10C	RABEPK		NTSR1
	KRT77	ZNF382		ODC1
	C12orf63	ZNF844		P2RY1
	KCNB1	EFCAB11		PALM
	TEPP	NFX1		PAPPA
	EFCAB5	CRNKL1		PAX7
	HSD11B1L	SUGP2		PCDHGC3
	C19orf45	WDR20		PCDH7
	SBSN	CSNK1G1		PCDH8
	B3GNT8	MPP5		PDE4B
	CCDC23	RIC3		PDGFB
[truncated: 3,040 more rows]
